# Supplementary material for: Involvement of Target of Rapamycin (TOR) Signaling in the Regulation of Crosstalk between Ribosomal Protein Small Subunit 6 Kinase-1 (RPS6K-1) and Ribosomal Proteins
Source: MDPI journal article supplement (doi:10.3390/plants12010176), 2023-01-01
Supplement: s1 [file s1]

**Involvement of Target of Rapamycin (TOR) signaling in the regulation of crosstalk between Ribosomal Protein Small Subunit 6 Kinase-1 (RPS6K-1) and ribosomal proteins**

**Achala Bakshi<sup>1, 3\*</sup>, Mazahar Moin<sup>1, 5</sup>, Meher B. Gayatri<sup>2</sup>, Aramati B. M. Reddy<sup>2</sup>, Raju Datla<sup>3\*</sup>, M. S. Madhav<sup>1, 4\*</sup>, P. B. Kirti<sup>5</sup>**

<sup>1</sup>Indian Institute of Rice Research, Rajendranagar, Hyderabad-500030, Telangana, India

<sup>2</sup>Department of Animal Biology, University of Hyderabad, Hyderabad-500046, Telangana, India

<sup>3</sup>Global Institute for Food Security, Saskatoon, SK, S7N 0W9, Canada

<sup>4</sup>Central Tobacco Research Institute, Rajahmundry-533105, Andhra Pradesh, India

<sup>5</sup>Agri Biotech Foundation, PJTS Agricultural University Campus, Rajendranagar, Hyderabad-500030, Telangana, India

**\* Correspondence to:**

Achala Bakshi: [achala.bakshi@gifs.ca](mailto:achala.bakshi@gifs.ca);

Raju Datla: [raju.datla@gifs.ca](mailto:raju.datla@gifs.ca);

M. S. Madhav: [sheshu24@gmail.com](mailto:sheshu24@gmail.com)

**Contact details of authors:**

Mazahar Moin: [moinmazahar@gmail.com](mailto:moinmazahar@gmail.com);

Meher B. Gayatri: [meher.gaya3@gmail.com](mailto:meher.gaya3@gmail.com);

Aramati B. M. Reddy: [binduaramati@gmail.com](mailto:binduaramati@gmail.com);

P. B. Kirti: [pbkirti@uohyd.ac.in](mailto:pbkirti@uohyd.ac.in), [pbkirti@gmail.com](mailto:pbkirti@gmail.com)

**Key words:** Target of Rapamycin; Ribosomal proteins large subunit genes; Ribosomal proteins small subunit genes

**Abbreviations:** TOR, Target of Rapamycin; TOR-OE, TOR overexpressing; RPs, Ribosomal Proteins; RPL, Ribosomal protein large subunit; RPS, Ribosomal protein small subunit; WT, Wild Type; DAG, Days after Germination; S6K1, Ribosomal Protein Small Subunit 6 Kinase1

```

OsRPS6A      MKFNIANPTTGCQKKLEIDDDQKLRAFFDKRISQEVSGDALGEEFKGYVFKIMGGCDKQG
OsRPS6B      MKFNIANPTTGCQKKLEIDDDQKLRAFYDKRISQEVSGDALGEEFKGYVFKIMGGCDKQG
AtRPS6A      MKFNVANPTTGCQKKLEIDDDQKLRAFYDKRISQEVSGDALGEEFKGYVFKIKGGCDKQG
AtRPS6B      MKFNVANPTTGCQKKLEIDDDQKLRAFFDKRLSQEVSGDALGEEFKGYVFKIMGGCDKQG
****:*****:***:*****

OsRPS6A      FPMKQGVLTAGRVRLLLHRGTPCFRGYGRRDGERRRKSVRGCIVSQDLSVINLVIVKKGE
OsRPS6B      FPMKQGVLTSGRVRLLLHRGTPCFRGYGRRDGERRRKSVRGCIVSQDLSVINLVIVKKGD
AtRPS6A      FPMKQGVLTTPGRVRLLLHRGTPCFRGHGRRTGERRRKSVRGCIVSPDLSVLNLVIVKKGE
AtRPS6B      FPMKQGVLTTPGRVRLLLHRGTPCFRGHGRRTGERRRKSVRGCIVSPDLSVLNLVIVKKGV
*****.*****:*** *****

OsRPS6A      NDLPGLTDTEKPRMRGPKRASKIRKLFNLSKDDDVRYVNTYRRTFTTKNGKKVSKAPKI
OsRPS6B      NDLPGLTDTEKPRMRGPKRASKIRKLFNLSKDDDVRYVNTYRRTFTTKNGKKVSKAPKI
AtRPS6A      NDLPGLTDTEKPRMRGPKRASKIRKLFNLSKDDDVRYVNTYRRTFTTKNGKKVSKAPKI
AtRPS6B      SDLPGLTDTEKPRMRGPKRASKIRKLFNLSKDDDVRYVNTYRRTFTTKNGKKVSKAPKI
.*****:***.*****.***:*****

OsRPS6A      QRLVTPLTLQKRRIADKKKRIAKKKSEAAEYQKLLAQRLKEQRRRSESLAKRRSKLS
OsRPS6B      QRLVTPLTLQKRRIADKKKRIAKKKSEAAEYQKLLAQRLKEQRRRSESLAKRRSKLS
AtRPS6A      QRLVTPLTLQKRRIADKKKRIAKANSDAADYQKLLASRLKEQRRRSESLAKRRSKLS
AtRPS6B      QRLVTPLTLQKRRIADKKKRIAKANSDAADYQKLLASRLKEQRRRSESLAKRRSKLS
*****:***:***:***:*****.*****:*****:***:***

OsRPS6A      SAAKAAATTA
OsRPS6B      AATTA-----
AtRPS6A      SAAAKPSVTA
AtRPS6B      SAPAKPVAA-
:*.

```

**Figure S1. Multiple sequence alignment of RPL and RPS proteins identifies conserved Ser/ Thr phosphorylation sites**

Sequence alignment of RPS6A/B proteins of *Arabidopsis thaliana* and *Oryza sativa* ssp. *japonica* were aligned using CLUSTAL Omega to identify the conserved sites for phosphorylation by AGC kinase family kinases specifically at Ser/ Thr residues. The *Arabidopsis* and rice RPS6 showed highest similarity of more than 90%. The sequence alignment of rice (*Oryza sativa* ssp. *japonica*) RPS6A/B proteins from ssp. *japonica* shared highest similarity with *Arabidopsis thaliana* RPS6A/B proteins in their Ser/Thr phosphorylation sites at similar amino acid positions (Thr9, Thr 10, Thr 69, Thr 81, Thr 127, Thr 129, Thr 161, Thr 165, Thr 167, Thr 168, Thr 185, Thr 188, Thr 248, Thr 249, Ser33, Ser 37, Ser 98, Ser 105, Ser 109, Ser 141, Ser 150, Ser 175, Ser 208, Ser 229, Ser 231, Ser 237, Ser 240, Ser 241; Supplementary Figures S1–S6). The OsRPL6 protein has twenty five Ser/ Thr phosphorylation sites for various AGC kinases (PKA, PKB, PKC, PKG and RSK)

```

AtRPL6A      -----PAKFYPAEDVK
OsRPL6      MAPTSKLSQGIKQASRSHTYHRRGLWAIKAKHGGA FPKAEKPAAAAAAPKFYPADDVK
AtRPS6A      -MKFNVANPTTGCQKKLEIDDDQKLRAFYDKRISQEVSGDALGEEFKGYVFKIMGGCDKQ
AtRPS6B      -MKFNVANPTTGCQKKLEIDDDQKLRAFFDKRLSQEVSGDALGEEFKGYVFKIMGGCDKQ
                        *: . * :

AtRPL6A      KPLVNRKPKPTKLKASITPGTVLIILAGRFGKGR-----VVF LKQLSSGLLLVTGPF
OsRPL6      PRQPS TRKPNPTKLRSSITPGTVLIILAGRFGKGR-----VVF LKQLSSGLLLVTGPF
AtRPS6A      GFPMKQGVLT PGRVRLLLH RGTFCFRGHGRRTGERRRKSVRGCI VSPDL SVLNLVIVKKG
AtRPS6B      GFPMKQGVLT PGRVRLLLH RGTFCFRGHGRRTGERRRKSVRGCI VSPDL SVLNLVIVKKG
                        . * ::: : ** : ** **: . . *: . *::

AtRPL6A      KINGVPLRRVNQAYVIGTSTKIDISGVNTEKFDDKYFGKVAEKKKKKTEGEFFAEKE--
OsRPL6      KINGVPIRRVNQPYVIATSTKVDISGVNVEKFDDKYFSRDKKQKAKKTEGELFETEKE--
AtRPS6A      ENDLPGLTDT EKPRMRGPKRASKIRKLFNLKKEDDVRTYVNTYRRKFTNKKGKEVSKAPK
AtRPS6B      VSDLPGLTDT EKPRMRGPKRASKIRKLFNLGKEDDVRYVNTYRRKFTNKKGKKVSKAPK
                        : : .::: : . . * : *: . . *: : . *::

AtRPL6A      -----EKK EIPQEKKE DQKTVDAALIKSIEAVPELKVYLGARFSLSQGMKPHELVF-----
OsRPL6      -----ATTNLPEFKKEDQKVVD AELIK AIEAVPDLKTYLGARFSLRDGDKPHEMVF-----
AtRPS6A      IORLVTP LTLQKRARIADKKKKI AKANS DAADYQKLLASRLKEQDRRSES LAKKRSRL
AtRPS6B      IORLVTP LTLQKRARIADKKKKI AKANS DAADYQKLLASRLKEQDRRSES LAKKRSRL
                        . *: . : *: . .::: : *::: . .:::

AtRPL6A      -----
OsRPL6      -----
AtRPS6A      SSAAAKPSVTA
AtRPS6B      SSAPAKPVAA-

```

**Figure S2.** Sequence alignment of RPS6A/B and RPL6 proteins of *Arabidopsis thaliana* and *Oryzasativa* ssp. *japonica*. The conserved Ser/Thr phosphorylation peptide sites are highlighted in red boxes.

```

AtRPS6A      MKFNVANPTTGCQKKLEIDDDQKLRAFYDKRISQEVSGDALGEEFKGYVFKIKGGCDKQG
AtRPS6B      MKFNVANPTTGCQKKLEIDDDQKLRAFFDKRLSQEVSGDALGEEFKGYVFKIMGGCDKQG
AtRPL18e/L15P -----MSIDLIAGGKSKKTKRTAPKSDDVYLKLLVKLYRFLVR----RSN
AtRL18C      -----MGIDLIAGGKSKKTKRTAPKSDDVYLKLLVKLYRFLVR----RSN
AtRPL18e/L15 -----
OsRL18A      -----MGAFRFHQYQVVGRLPTPTDEHPKIYR-----

AtRPS6A      FPMKQGVLT PGRVRLLLHRGT PCFRGHGRTGE RRRKSVRGCI VSPDLSVNLNLI VVKGE
AtRPS6B      FPMKQGVLT PGRVRLLLHRGT PCFRGHGRTGE RRRKSVRGCI VSPDLSVNLNLI VVKGV
AtRPL18e/L15P SNFNAVILKRLFMSKVNKAPLSLSRLVEPMTGKDDKIAVLVGTITDDIRVHEIPAMK---
AtRL18C      SNFNAVILKRLFMSKVNKAPLSLSRLVEPMTGKDDKIAVLVGTITDDIRVHEIPAMK---
AtRPL18e/L15 -----MSKVNKAPLSLSRLVEPMTGKDDKIAVLVGTITDDIRVHEIPAMK---
OsRL18A      --MKLWATNEVRAKSKFWYFLRKLKKVKKSNQIILAINIEIFEKNPTTIKNYGIWLRYS-
                                     :      * :      :

AtRPS6A      NDLPGLTDEKPMRGPKRASKIRKLFNLKKEDDVRTYVNTYRRKFTNKKGKEVSKAPKI
AtRPS6B      SDLPGLTDEKPMRGPKRASKIRKLFNLGKEDDVRYVNTYRRFTNKKGKKVSKAPKI
AtRPL18e/L15P --VTALRFTERARARIEKAGGECLTFDQLALR-----APLG
AtRL18C      --VTALRFTERARARIEKAGGECLTFDQLALR-----APLG
AtRPL18e/L15 -----VTALRFTERARARIEKAGGECLTFDQLALR-----APLG
OsRL18A      --RTGYHMYKEYRDTTLNGAVEQMYTEMASR-----HRV
                                     .. :      : :

AtRPS6A      QRLVTPLTLQKRKRARIADKKKKIAKANSDAADYQKLLASRLKEQRDRRSSESLAKKRSRLS
AtRPS6B      QRLVTPLTLQKRKRARIADKKKRIAKANSDAADYQKLLASRLKEQRDRRSSESLAKKRSRLS
AtRPL18e/L15P QNTVLLRGPKNSREAVKHFGPAPGVFHSNTKPYVRHKGRKFEKARGKRKSRGFKV----
AtRL18C      QNTVLLRGPKNSREAVKHFGPAPGVFHSNTKPYVRHKGRKFEKARGKRKSRGFKV----
AtRPL18e/L15 -----QNTVLLRGPKNSREAVKHFGPAPGVFHSNTKPYVRHKGRKFEKARGKRKSRGFKV----
OsRL18A      RFPCIQIIKTATVHFKLCKRDNTKQEHKSDIKEPLVYRKVRPPTPKLKTTFKASRPNLFM
                                     :      : :      * :

AtRPS6A      SAAAKPSVTA
AtRPS6B      SAPAKPVAA-
AtRPL18e/L15P -----
AtRL18C      -----
AtRPL18e/L15 -----
OsRL18A      -----

```

**Figure S3.** Alignment of RPS6A/B and RPL18 proteins of *Arabidopsis thaliana* and *Oryza sativa* ssp. *japonica*.



```

AtrPS6A      MKFNVANPTTGCQKKLEIDDDQKLRAFYDKRISQEVSGDALGEEFKGYVFKIKGGCDKQG
AtrPS6B      MKFNVANPTTGCQKKLEIDDDQKLRAFYDKRLSQEVSGDALGEEFKGYVFKIMGGCDKQG
OsRPL23-1    -----MSKRGRGGSAGNKFMSLGLPVAATVNCADNTG
OsRPL23-2    -----MSKRGRGGSAGNKFMSLGLPVAATVNCADNTG
AtrPL23aA    -----MSPAKVDVTKKADPKAKALKAAKAVKSGQAFKKK
AtrPL23aB    -----MSPAKVDVTKKADPKAKALKAAKAVKSGQIVKKP
              :      :      :      :      :

AtrPS6A      FPMKQGVLT PGRVRI LLHRGT PCFRGHGRRTGERRRKSVRGCI VSPDLSVLNLVIVKKGE
AtrPS6B      FPMKQGVLT PGRVRI LLHRGT PCFRGHGRRTGERRRKSVRGCI VSPDLSVLNLVIVKKGV
OsRPL23-1    AKNLYI ISVKG IKGFLNRLPSACVG-----DMVMATVKKGK
OsRPL23-2    AKNLYI ISVKG IKGFLNRLPSACVG-----DMVMATVKKGK
AtrPL23aA    DKKIRT KVT FHRPKT LTKPRTGKYP-----KISATPRNK
AtrPL23aB    AKKIRT KVT FHRPKT LTKPRTGKYP-----KISATPRNK
              :      :      :      :      :
              *      :      :      :

AtrPS6A      NDLPGLTDTEKPRMRGPKRASKIRKLFNLKKEDDVRTYVNTYRRKFTNKKGKEVSKAPKI
AtrPS6B      SDLPGLTDTEKPRMRGPKRASKIRKLFNLKKEDDVRTYVNTYRRFTNKKGKKVSKAPKI
OsRPL23-1    PDLR-----KKVMPAVIVRQRKFWRRKDGVMYFEGIIHR-----
OsRPL23-2    PDLR-----KKVMPAVIVRQRKFWRRKDGVMYFEDNAGVIVNPKGEMKGSAITG
AtrPL23aA    LDHY-----QILKYPLTTESAMKKIEDNNTLVFIVDIIRADKKKIKDAVKKMYDI
AtrPL23aB    LDHY-----QILKYPLTTESAMKKIEDNNTLVFIVDIIRADKKKIKDAVKKMYDI
              *      :      :      :      :
              :      :      :      :

AtrPS6A      QRLVTPLT LQRKRRIADKKKKIAKANSDAADYQKLLASRLKEQRDRRSESLAKKRSRLS
AtrPS6B      QRLVTPLT LQRKRRIADKKKKIAKANSDAADYQKLLASRLKEQRDRRSESLAKKRSRLS
OsRPL23-1    -----
OsRPL23-2    P-----IGKECADLWPRIASAANAIV-----
AtrPL23aA    QTKKVNTLIRPDGTTKAYVRLTPDYDALDVANKIGII-----
AtrPL23aB    QTKKVNTLIRPDGTTKAYVRLTPDYDALDVANKIGII-----

AtrPS6A      SAAAKPSVTA
AtrPS6B      SAPAKPVAA-
OsRPL23-1    -----
OsRPL23-2    -----
AtrPL23aA    -----
AtrPL23aB    -----

```

**Figure S4.** Alignment of RPS6A/B and RPL23 proteins of *Arabidopsis thaliana* and *Oryza sativa ssp. japonica*. The conserved Ser/Thr phosphorylation peptide sites are highlighted in red boxes.



```

AtRPS28A      -----MDSQIKHAVVVKVMG-----
AtRPS28C      -----MDSQIKHAVVVKVMG-----
OsRPS28       -----QPEKRSMDTQVKLAVVVKVMG-----
AtRPS6A      MKFNVANPTTGCQKKLEIDDDQKLRAFYDKRISQEVSGDALGEEFKGYVFKIKGGCDKQG
AtRPS6B      MKFNVANPTTGCQKKLEIDDDQKLRAFFDKRLSQEVSGDALGEEFKGYVFKIMGGCDKQG
               : . *.*: *

AtRPS28A      -----RTGSRGQ-----
AtRPS28C      -----RTGSRGQ-----
OsRPS28       -----RTGSRGQ-----
AtRPS6A      FPMKQGVLT PGRVRLLLHRGTPCFRGHGERTGERRRKSVRGCI VSPDLSVLNLVIVKKGE
AtRPS6B      FPMKQGVLT PGRVRLLLHRGTPCFRGHGERTGERRRKSVRGCI VSPDLSVLNLVIVKKGV
               ***.*:

AtRPS28A      -----
AtRPS28C      -----
OsRPS28       -----
AtRPS6A      NDLPGLTDTEKPRMRGPKRASKIRKLFNLKKEDDVRTYVNTYRRKFTNKKGKEVSKAPKI
AtRPS6B      SDLPGLTDTEKPRMRGPKRASKIRKLFNLGKEDDVRKYVNTYRRTFTNKKGKKVSKAPKI

AtRPS28A      -----VTQVRVKFTDS--DRYIMRNVKGFVREGDILTLLESEREAR-----RLR--
AtRPS28C      -----VTQVRVKFTDS--DRFIMRNVKGFVREGDVLTLLESEREAR-----RLR--
OsRPS28       -----VTQVRVKFLDDQNRLIMRNVKGFVREGDILTLLESEREAR-----RLR--
AtRPS6A      QRLVTPLTLQRRARIADKKKKIAKANSDAADYQKLIASRLKEQDRRSESLAKKRSRLS
AtRPS6B      QRLVTPLTLQRRARIADKKKKIAKANSDAADYQKLIASRLKEQDRRSESLAKKRSRLS
               : : *.: * . : * ... : : : *.:*: * *

AtRPS28A      -----
AtRPS28C      -----
OsRPS28       -----
AtRPS6A      SAAAKPSVTA
AtRPS6B      SAPAKPVAA-

```

**Figure S6** Alignment of RPS6A/B and RPS28 proteins of *Arabidopsis thaliana* and *Oryza sativa* ssp. *japonica*. The conserved Ser/Thr phosphorylation peptide sites are highlighted in red boxes.



*l24A/L24A*    *tor/TOR*    *l23A/L23A*    *s28A/S28A*    *l6/L6*    *l18/L18*    *s6k1/S6K1*

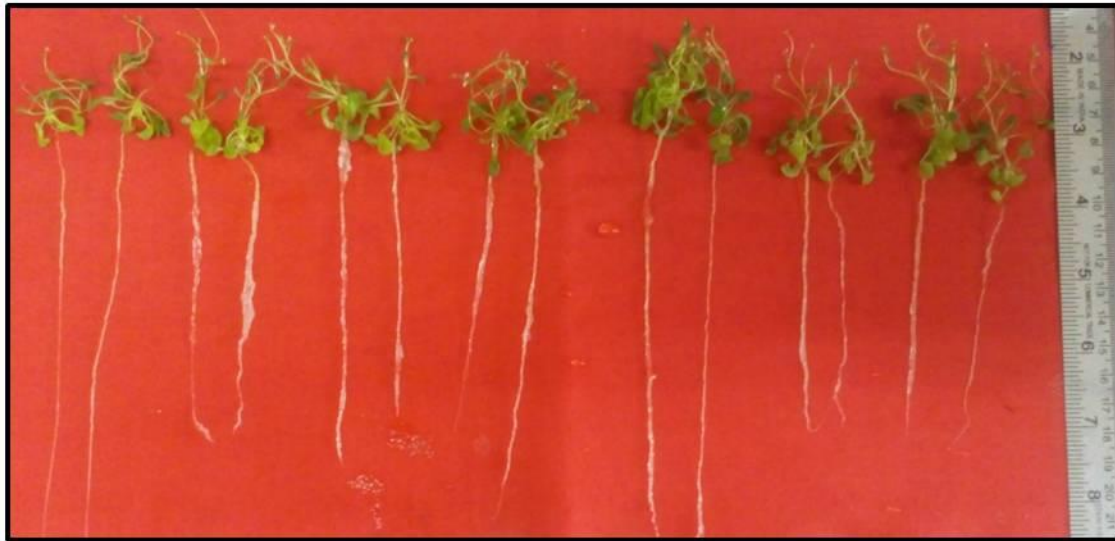

**Figure S7. Phenotype of heterozygous T-DNA Arabidopsis mutants of ribosomal protein genes in T<sub>1</sub> generation**

The T-DNA insertional mutants of RP genes in T<sub>1</sub> generation were grown on ½ strength MS medium supplemented with 3% sucrose showed pre-mature flowering and differential root-shoot growth. From left to right; SALK lines *rpl24a* (SALK\_064513), *tor* (SALK\_138622), *rpl23A* (SALK\_091329), *rps28A* (SALK\_094189), *rpl6* (CS16176), *rpl18* (SALK\_134424C), *Ats6k1* (SALK\_113295).



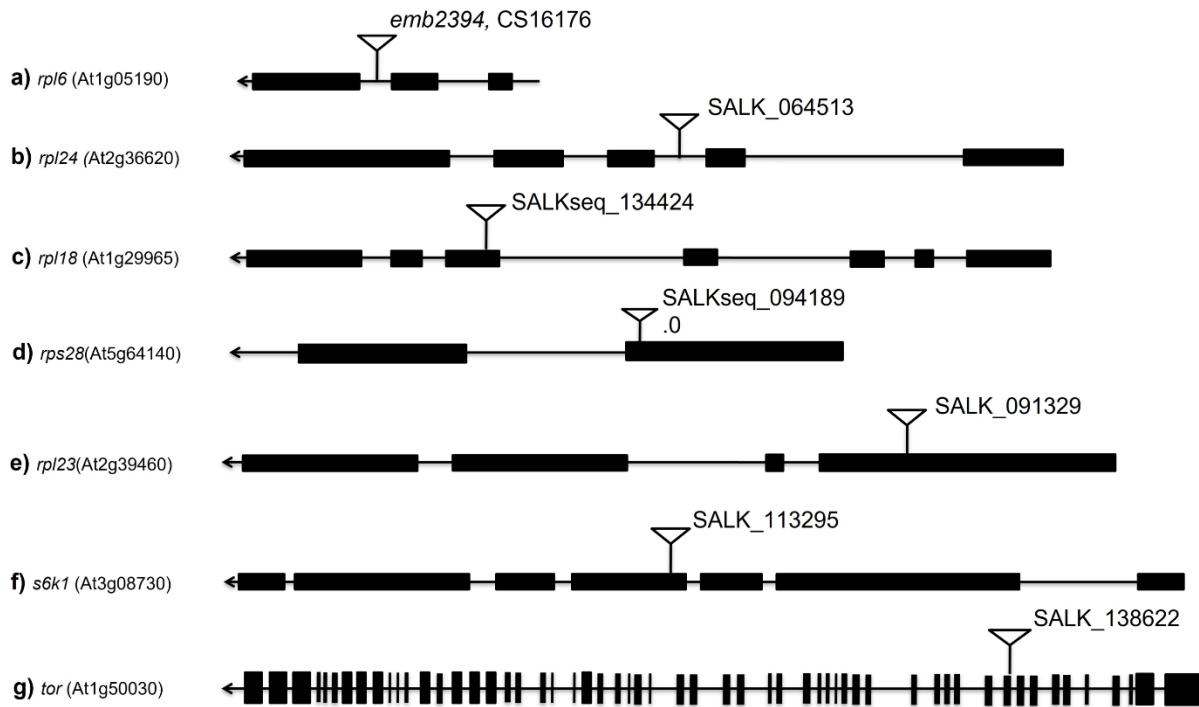

**Figure S8. Positions of T-DNA insertion site in the Salk Arabidopsis mutant lines**

Maps representing the location of T-DNA insertions in the (a) *rpl6* (CS16176), (b) *rpl24* (SALK\_064513), (c) *rpl18* (SALK\_134424C), (d) *rps28* (SALK\_094189), (e) *rpl23* (SALK\_091329), (f) *s6k1* (SALK\_113295.1), and (g) *tor* (SALK\_138622) mutants of Arabidopsis.

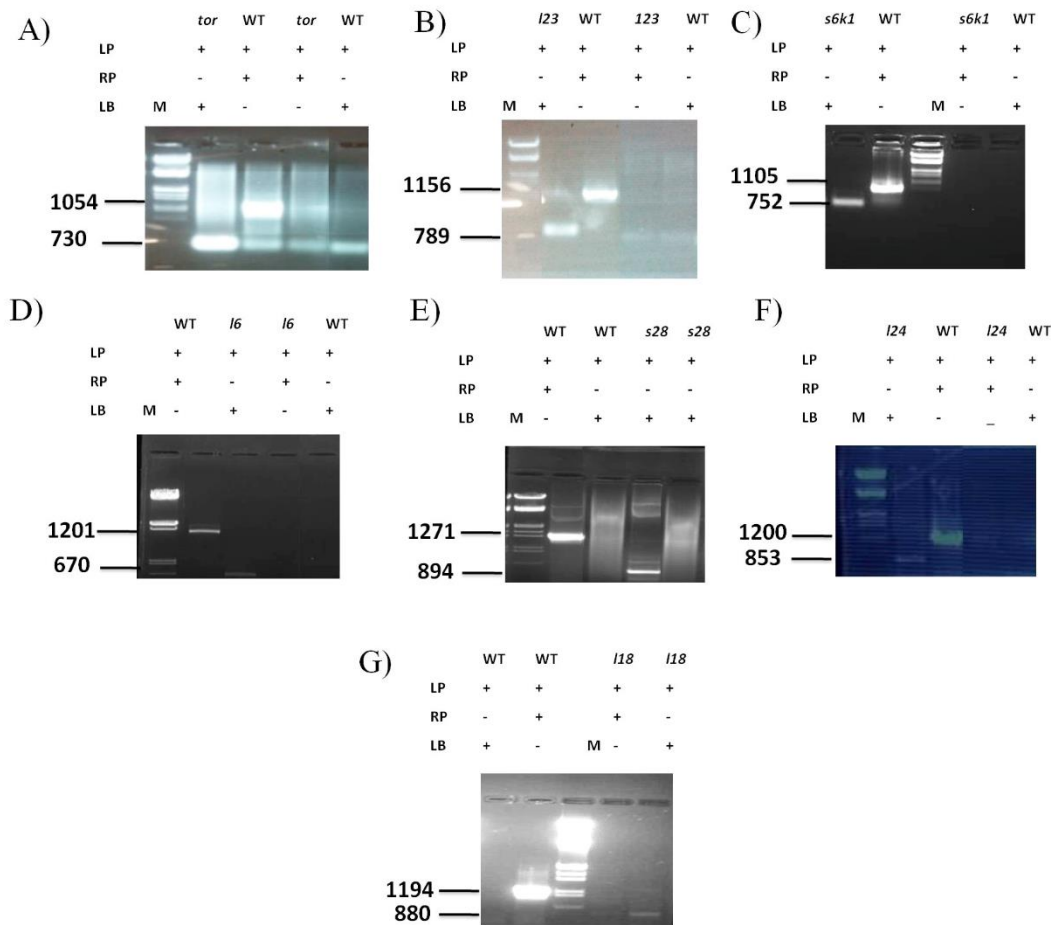

**Figure S9. Genotyping of mutants for confirmation of T-DNA insertion**

Genotyping of T-DNA insertion alleles of (a) *tor/tor* (b) *rpl23/rpl23* (c) *s6k1/s6k1* (d) *rpl6/rpl6* (e) *rps28/rps28* (f) *rpl24/rpl24* (g) *rpl18/rpl18* homozygous mutants of Arabidopsis. Mutant genotypes were verified by performing genomic PCRs using gene specific Left primers (LP), Right primers (RP) and T-DNA left border specific primer. The homozygous nature of mutants was confirmed by conducting PCR on genomic DNA using the gene specific primers LP and RP to amplify the gene in which T-DNA is inserted. The primers for genotyping of mutants were designed by using T-DNA Primer design website, T-DNA Express database <http://signal.salk.edu/cgi-bin/tdnaexpress> and protocol for genotyping of mutants was obtained from <http://signal.salk.edu/tdnaprimers.2.html>. The three universal primers LBa1, LB6313R and LBb1 of T-DNA left border and gene specific LP and RP were designed. Genomic DNA was isolated from the insertion mutant lines using CTAB extraction method and 100 ng genomic DNA template was used for PCR reactions to produce a single amplicon following 35 cycles including 3 min at 94°C, 45 s at specific annealing temperature ranging from 50°C-60°C followed by 2 min at 72°C using either LP + RP primers for amplification of the mutant genes in the WT or heterozygous lines. The LB + RP primers for the forward orientation T-DNA insertion mutants

were used to amplify the length between mutant gene and the T-DNA left border in the homozygous and heterozygous lines. The primer sequences, amplicon length and details of the PCR conditions used in genotyping of mutants are listed in the Supplementary Table S4. The LP and RP amplifies gene in the WT and hemizygous or null mutants (Supplementary Table S4). The primers specific to the left border of T-DNA insert (LB) and RP were used to amplify the products of left border and 3' end of the gene, which was amplified only in the plants hemizygous and homozygous in nature. For each mutant line a minimum of 10 plants were screened for homozygosity.

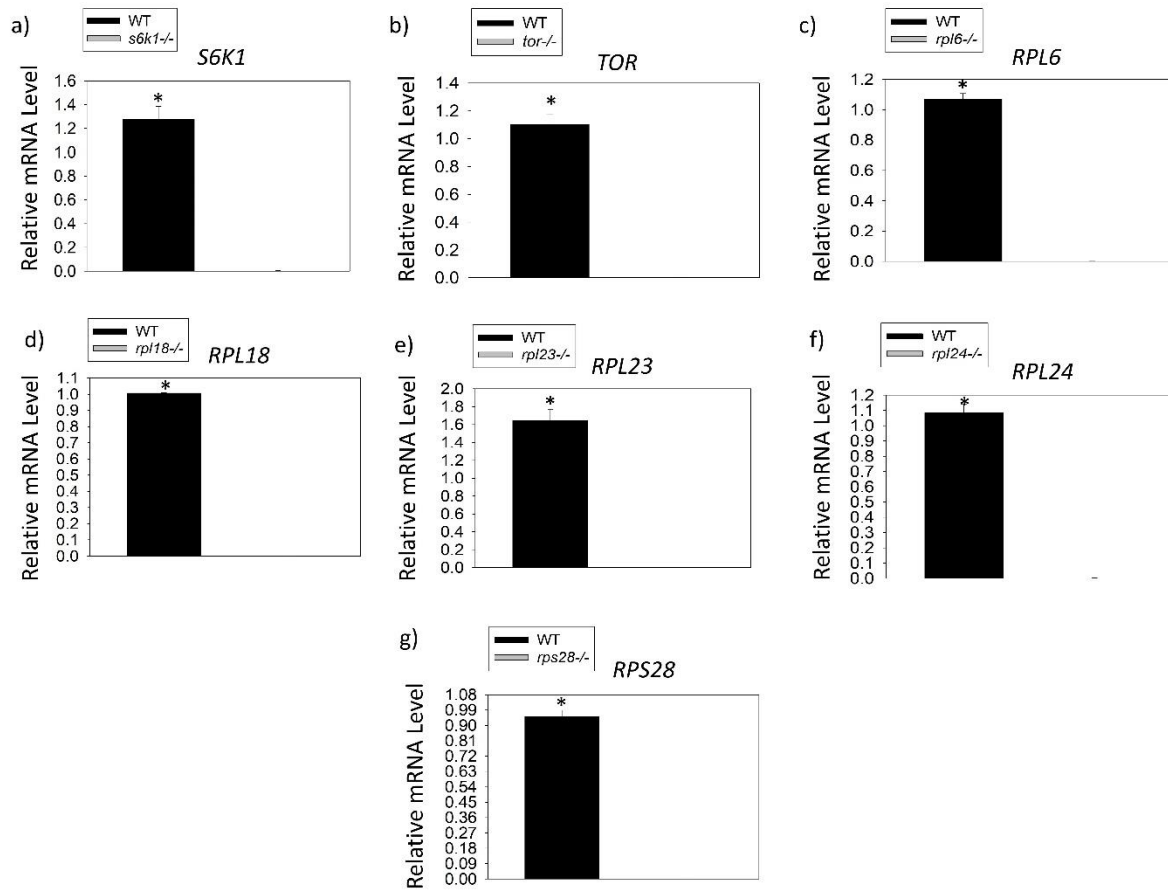

**Figure S10. Measurement of transcript level of the mutant allele in the SALK lines**

The Relative mRNA accumulation of the T-DNA inserted allele was analyzed in the SALK lines with homozygous alleles with T-DNA insertion of a) *s6k1*<sup>-/-</sup> b) *tor*<sup>-/-</sup> c) *rpl6*<sup>-/-</sup> d) *rpl18*<sup>-/-</sup> e) *rpl23*<sup>-/-</sup> f) *rpl24*<sup>-/-</sup> and g) *rps28*<sup>-/-</sup> genes using qRT-PCR. The data was normalized using *Act2* and *utub* as endogenous reference genes and WT as control. Vertical bars indicate the mean  $\pm$  SE of three independent biological and three technical experiments and ANOVA analysis indicated the statistically significant differences, represented with asterisks (\*)  $P < 0.05$ .



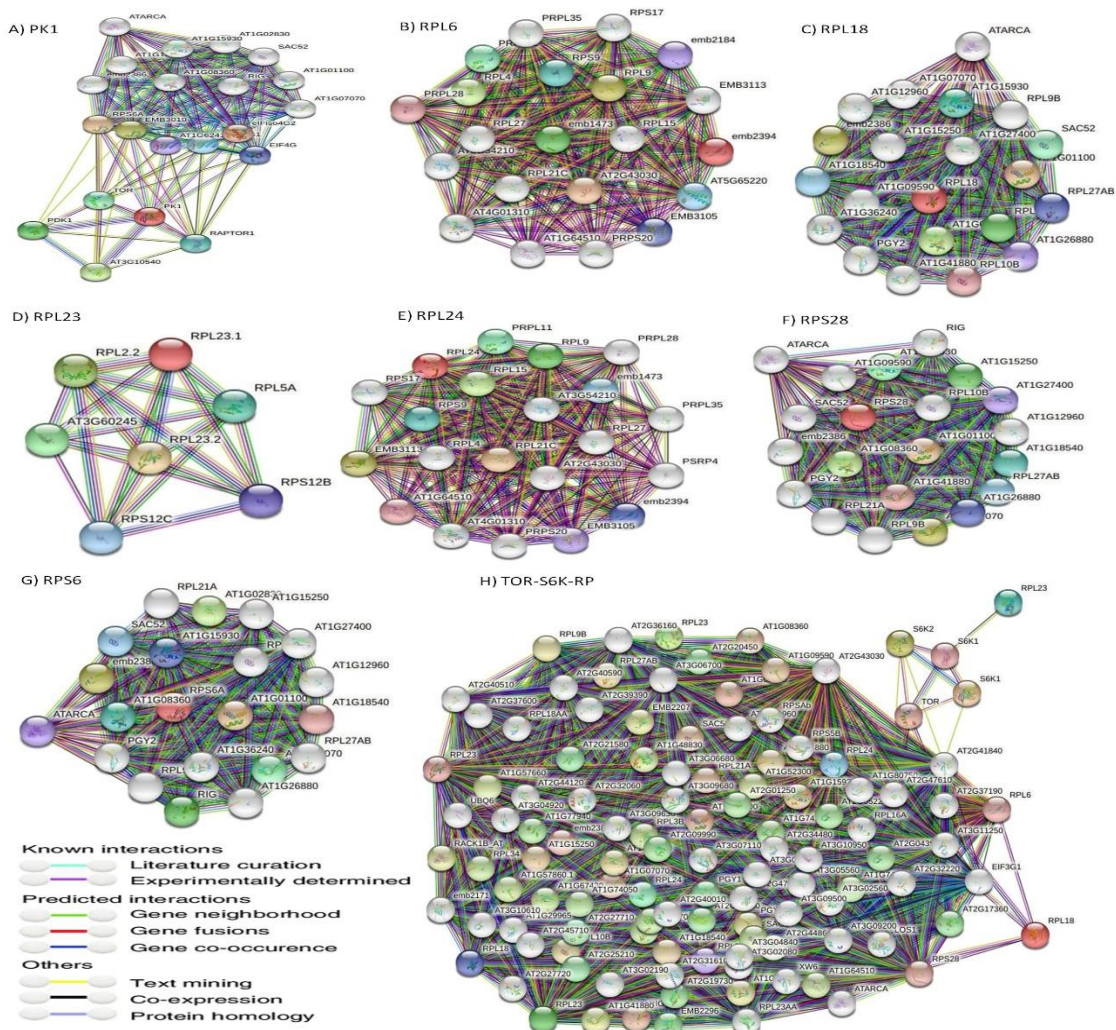

**Figure S11. Identification of interacting proteins of TOR-S6K-RPs signaling.**

Schematic representation of the PPI network consisting of interactions between input proteins was obtained based on evidence present on high-throughput lab experiments, curated databases, and gene expression data of their direct interactions. The PPI networks of (A) S6K1 (PK1), (B) RPL6, (C) RPL18, (D) RPL23, (E) RPL24, (F) RPS28, (G) RPS6, and (H) the TOR-RPS6K1-RP networks were analyzed separately. The red color node indicates the query protein, and the different colors of nodes represent different interacting proteins relative to the query protein. Different colors of lines connecting the proteins within the PPI network show various modes of interaction. The RPL24 (AT2G36620) protein interacts with the other structural constituents of ribosome assembly such as RPL19e (emb2386, AT1G02780.1), RPS26e (AT2G40590), RPS5 (AT2G41840), RPL16A (AT2G42740.1), RPL18e/L15 family protein (AT2G47570), RPL10 or RPP0 (AT3G09200), RPL4/L1 (AT3G09630), RPS12/S23 (AT3G09680), RPS17 (AT3G10610), RPS24e family (AT3G04920), RPS28

(AT5G64140.1), RPL23AA (AT2G39460.2), RPL11 (AT2G37190), RPS5B (AT2G37270.2), RPS11 (AT2G36160), Zinc-binding RPL37ae (AT3G10950), PGY2 (encodes RPL9, AT1G33140.1), RPL35Ae (AT1G41880), Translation protein SH3-like family protein RPL21e (AT1G57660), RPL3B (AT1G61580.1), Senescence associated gene 24 (SAG24, AT1G66580.1) and RPL22p/L17e (AT1G67430). RPS28C (AT5G64140) interacts with ribosomal constituents RPL23 (ATCG00840.1 & ATCG01300.1), RPL21A (AT1G09590.1), RPL18 (AT3G05590.1), RPL16A (AT2G42740.1), RPL10B (AT1G26910.1), RIG (AT1G04270.1, encodes a cytosolic RPS15), RACK1B\_AT, PGY2 (AT1G33140.1, encodes RPL9), PGY1 (AT2G27530.1; encodes RPL10aP),

**Table S1. List of primers used in RT-qPCR analysis of RPS genes in *TOR*-OE lines of rice**

| S. No. | Primer name              | Sequence 5'- 3'                                |
|--------|--------------------------|------------------------------------------------|
| 1.     | S3a RT FP<br>S3a RT RP   | TGAAGCCCATGTGGATGTTA<br>TCACATGTTGATGCCTGGTT   |
| 2.     | S4 RT FP<br>S4 RT RP     | CAGGTTGAAGTATGCGCTGA<br>AGCGACCCTTGGTGTCATAG   |
| 3.     | S4a RT FP<br>S4a RT RP   | AGCGGCATGTTATGGTTGAT<br>GGACCTTGCAGAGCTTGAAC   |
| 4.     | S5 RT FP<br>S5 RT RP     | ATATCCCTCGCCGACTACCT<br>TGATCTTCTTGCCGTTGTTG   |
| 5.     | S5a RT FP<br>S5a RT RP   | CAACGGGAAGAAGATCATGG<br>GACCCTCCTCAAGGGAGAGA   |
| 6.     | S6 RT FP<br>S6 RT RP     | GCTACGGCATCAAGAAGCTC<br>CAAGTGCCGTGTCACAAAGT   |
| 7.     | S6a RT FP<br>S6a RT RP   | CATGAAGCAGGGTGTGCTTA<br>TCAGTCAAGCCAGGAAGGTC   |
| 8.     | S7 RT FP<br>S7 RT RP     | TGTGCAAGGCATTCAAGAAA<br>TCCAAGATTCCATCATGAACAG |
| 9.     | S7a RT FP<br>S7a RT RP   | AGAAGAAGTTCAGCGGCAAG<br>GCACCATCCAGACGGTATCT   |
| 10.    | S9 RT FP<br>S9 RT RP     | TTATCAGGCAGCACCATC<br>GGCCTTCTGGTTCTTCCTCT     |
| 11.    | S9-2 RT FP<br>S9-2 RT RP | GAGCTGTGGCGTGTTTCAGTA<br>AACAGTGAGGGCAAGGACAT  |
| 12.    | S10 RT FP<br>S10 RT RP   | CCCTCAAGAAGTCTGCCAAG<br>ACCAAATCACCTGGAGCAC    |
| 13.    | S10a RT FP<br>S10a RT RP | GCATTGAGCACCTGAGGAAT<br>AACCTTGGTCTGTCCCCTTC   |
| 14.    | S13 RT FP<br>S13 RT RP   | AGGTGGAGGAGATGATCGTG<br>GACGGCCTTCTTGATGAGG    |

|     |                                |                                                |
|-----|--------------------------------|------------------------------------------------|
| 15. | S13a RT FP<br>S13a RT RP       | GTGGTGCTCCGTGACCAG<br>TGGAGTCCTTGTCCTTCCTG     |
| 16. | S15 RT FP<br>S15 RT RP         | ATGACCTCGTCCAGCTCTTC<br>CCGATCATCTCAGGGACAAT   |
| 17. | S15a RT FP<br>S15a RT RP       | CCGACCCTCATCAAAGGTTA<br>TCCTTGACACCAACATCGAA   |
| 18. | S17 RT FP<br>S17 RT RP         | AACAAGAAGGTGCTGGAGGA<br>TCCTGGAGCTTGAGGGAGAT   |
| 19. | S18 RT FP<br>S18 RT RP         | CGACATCGACATGAACAAGC<br>TCAGCCTCTCAAGGTCATCC   |
| 20. | S18a RT FP<br>S18a RT RP       | CTCACCTCCATCAAGGGTGT<br>ACCTCCCGTCCTTGTAAGTCC  |
| 21. | S18b RT FP<br>S18b RT RP       | AAGGATGGGAGGTTCTCTCAG<br>TCTTGAGACACCGACAGTCT  |
| 22. | S19 RT FP<br>S19 RT RP         | CAAGATGGAGCTCCCTGAGT<br>GGACGTGAGCCATTCCTCT    |
| 23. | S20 RT FP<br>S20 RT RP         | GCACCAGGATGAAGAAGGTT<br>TGCGATGGTTACCAGTATTCC  |
| 24. | S21 RT FP<br>S21 RT RP         | TCAGATGGTGGACCTCTACG<br>AGAGCACTGTCGGCGTCT     |
| 25. | S23 RT FP<br>S23 RT RP         | GAGCCATCTTGGCAATGAAT<br>CGATGAAGTTCAAGCAACCA   |
| 26. | S23a RT FP<br>S23a RT RP       | TTTTGGGAGAAAAAGGCTTG<br>CCTCTGCTTCTTCTTCTCCTTG |
| 27. | S24 RT FP<br>S24 RT RP         | GTCTCCAAGGCTGAGCTGAA<br>CTTGGGCTCGTACTTCTTCG   |
| 28. | S25 RT FP<br>S25 RT RP         | GGGAAAGCAAAAGGAGAAGG<br>GATTAGGCCCGTGTCTATTA   |
| 29. | S25a RT FP<br>S25a RT RP       | CGGAGGCAAGCAGAAGAAG<br>CAAGATCCTTGATGGCCTGT    |
| 30. | S26 RT FP<br>S26 RT RP         | CAAGGCGATCAAGAGGTTTC<br>GACGATGTGAGCATGGATTG   |
| 31. | S27 RT FP<br>S27 RT RP         | CGGAGCTGGAGAAGCTCA<br>CTGGCCTTCCCACCAGTAG      |
| 32. | S27a RT FP<br>S27a RT RP       | CGAAGATCCAGGACAAGGAG<br>CTTGGGCTTGGTGTACGTCT   |
| 33. | S28 RT FP<br>S28 RT RP         | GGATACCCAGGTCAAACCTTGC<br>CTGGCCTCCCTCTCAGACT  |
| 34. | S29 RT FP<br>S29 RT RP         | CACTCCAACGTGTGGAATC<br>CGGTACTTGATGAAGCCAATG   |
| 35. | S30 RT FP<br>S30 RT RP         | GAAGGTGAGGGGGCAGAC<br>GACGAAACGGCGGTTGTACT     |
| 36. | OsActin1RT FP<br>OsActin1RT RP | TCCCCCATGCTATCCTTCG<br>TGAATGAGTAACCACGCTC     |
| 37. | OsTubulinRTFP<br>OsTubulinRTRP | TGACCACACCTAGCTTTGG<br>AGGGAACCTTAGGCAGCATG    |

**Table. S2. List of primers used in RT-qPCR analysis of RPL genes in *TOR*-OE lines of rice**

| S. No. | Primer Name                  | Sequence (5'-3')                               |
|--------|------------------------------|------------------------------------------------|
| 1.     | RPL3 RT FP<br>RPL3 RT RP     | TGGACTTGTGGCCTATGTGA<br>CCGGCATCGCTATCATACTT   |
| 2.     | RPL4 RT FP<br>RPL4 RT RP     | AAGAAGCTCGACGAGGTGTA<br>CCACATTCTTCAGAGGGTTC   |
| 3.     | RPL5 RT FP<br>RPL5 RT RP     | GATCTTGGCATCAAGTACGAC<br>GACACCCTCATACTTGACCTG |
| 4.     | RPL6 RT FP<br>RPL6 RT RP     | GTTCCTCAAGCAGCTCAAAT<br>CTTCTGCTTCTTGTCCCTAGA  |
| 5.     | RPL7 RT FP<br>RPL7 RT RP     | TACCCAAACCTGAAGAGTGTC<br>GACAGTCATGATCTCGTGGA  |
| 6.     | RPL8 RT FP<br>RPL8 RT RP     | ACTACGCCATCGTCATCAG<br>GGTACTTGTGGTAGGCGTTT    |
| 7.     | RPL10 RT FP<br>RPL10 RT RP   | AGAAGAAGCCTGGATTAGAGC<br>ATATCCTGCTGGAGGACTTG  |
| 8.     | RPL11 RT FP<br>RPL11 RT RP   | AAGAAGATCGGTGAGGACATC<br>TCTTGACCTTCTTCCTGTCC  |
| 9.     | RPL12 RT FP<br>RPL12 RT RP   | GCTCATTTGTACAGCACAGAG<br>TTGGTTCAGTCTGAGAAGGAG |
| 10.    | RPL13a RT FP<br>RPL13a RT RP | GAACTACCACGACACCATCAG<br>GGGGCCAAAATATCTATCTG  |
| 11.    | RPL13b RT FP<br>RPL13b RT RP | AAGCACTGGCAGAACTATGTC<br>CCCTCGACTTCATGTTGTACT |
| 12.    | RPL14 RT FP<br>RPL14 RT RP   | GTGAACTACGGCAAGGACTAC<br>TAACATCAGCCTCCTCCATAG |
| 13.    | RPL15 RT FP<br>RPL15 RT RP   | ACAAGTACGTGTCGGAGCTAT<br>GACACGGTAAACCACATAACC |
| 14.    | RPL18a RT FP<br>RPL18a RT RP | TCCAAGTTCTGGTACTTCCTG<br>GTTGTGGTAACCTGTTCTGCT |
| 15.    | RPL18p RT FP<br>RPL18p RT RP | TGGGGAGGACTACTATGTTGA<br>AAACCTCTTGTCCTGTGAGG  |



|     |                                        |                                                |
|-----|----------------------------------------|------------------------------------------------|
| 16. | RPL19.3 RT FP<br>RPL19.3 RT RP         | AGTATCGTGAGGCCAAGAAG<br>CTTAGCCTCAAACCTGGTCAGA |
| 17. | RPL21.2 RT FP<br>RPL21.2 RT RP         | CTGAGGAAGATCAAGAACGAC<br>AACCACCCTTGAGATCATTG  |
| 18. | RPL22 RT FP<br>RPL22 RT RP             | GAGGTGAAAGGTCTGGATGTT<br>TCACTGGTTCTTCCTTCTCTG |
| 19. | RPL23A RT FP<br>RPL23A RT RP           | GACCAAAGACCCTGAAGAAGG<br>ACGATGAAGACAAGGGTGTTG |
| 20. | RPL24b RT FP<br>RPL24b RT RP           | GTTGGTGCTACACTGGAAGTT<br>CCTTCGACTGTGTCTTCTGAG |
| 21. | RPL26.1 RT FP<br>RPL26.1 RT RP         | ACAAGTACAACGTGGTGAGG<br>GTCCTTGTCGAGCTTGAGTT   |
| 22. | RPL27.3 RT FP<br>RPL27.3 RT RP         | CTTCCTCAAGCTCGTCAACT<br>CTTGGTGAAGAACCACCTGT   |
| 23. | RPL28 RT FP<br>RPL28 RT RP             | TAGACGAATACCTCCTGAAGA<br>AAACCCTGTTGATCTTAGTC  |
| 24. | RPL29 RT FP<br>RPL29 RT RP             | CCCAACAAGCTCTCCAATATA<br>AGAAACAGAAGCATTCCTG   |
| 25. | RPL30e RT FP<br>RPL30e RT RP           | GAGCAAGAAGAAGAACAAGTC<br>GCTTCATCCATATCTTTTCCG |
| 26. | RPL31 RT FP<br>RPL31 RT RP             | TCAAGGAGATCAGGAAGTTTG<br>AACAGTGACCAGAGAGTAGAG |
| 27. | RPL32 RT FP<br>RPL32 RT RP             | GCCTAATATTGGCTATGGTTC<br>CTTCTTCGTTGAGACATTGTG |
| 28. | RPL34 RT FP<br>RPL34 RT RP             | GAAGAAGATCCAGGGAATTCC<br>CACAATCTTCTGCTCTTCAAC |
| 29. | RPL35a.3 RT<br>FP<br>RPL35a.3 RT<br>RP | CTACGTCTACAAGGCCAAG<br>TGCTGGGGTACATGAAGA      |
| 30. | RPL36.2 RT FP<br>RPL36.2 RT RP         | GGAAAAGTACCAAGAGAGTGA<br>CTTCTTCTTTGCTCTCTTG   |
| 31. | RPL37 RT FP<br>RPL37 RT RP             | CTTCACCTGCAGAAGAG<br>CCCCTCTCTGAAGTTACTCT      |
|     | RPL38 RT FP                            | CACGAGATCAAGGACTTCC                            |

|     |                            |                                                |
|-----|----------------------------|------------------------------------------------|
| 32. | RPL38 RT RP                | AAAGGTGGATGAAATGTAGGC                          |
| 33. | RPL44 RT FP<br>RPL44 RT RP | AAGAAGACCTACTGCAAGAAC<br>CCTTACCCTTCTTGTACTGAG |
| 34. | RPL51 RT FP<br>RPL51 RT RP | GTGACAGAGTTAGTCCGTGGA<br>TCTCAGCTTCACCACTTTCCT |

**Table. S3. List of primers used in RT-qPCR analysis of RPL/RPS genes in the *TOR*-OE lines of *Arabidopsis thaliana***

| S. No. | Accession | Primer name           | Sequence (5'-3')                                       |
|--------|-----------|-----------------------|--------------------------------------------------------|
| 1.     | At1g72370 | RPSaAFP<br>RPSaARP    | CCTGGTACCTTCACCAATCAGATGC<br>GTTGTTGGCTGGGATACCAATGTCA |
| 2.     | At1g58380 | RPS2FP<br>RPS2RP      | AAGGCCTTTGTTGTTGTTGG<br>CCCAATCTTATCCCCCAGT            |
| 3.     | At2g31610 | RPS3AFP<br>RPS3ARP    | TGGAGCTAAGGGATGTGAGGTCATC<br>AATGGTGTCTTTGGTCCTGATTTGC |
| 4.     | At3g04840 | RPS3aFP<br>RPS3aRP    | GCAACTCAGGGCATCTACCCTC<br>CAGCCGGCCTGTCTACCTTAACA      |
| 5.     | At2g17360 | RPS4FP<br>RPS4RP      | TGCTGGTTTCATGGATGTTG<br>CATGGCTTTGTTCCCTTACCG          |
| 6.     | At2g37270 | RPS5aFP<br>RPS5aRP    | GCCGCGGCTAAAGATCCCTACTT<br>GGCACTGCGCCTTTCTGAACCT      |
| 7.     | At4g31700 | RPS6aFP<br>RPS6aRP    | CGATCTTCCTGGGCTTACCGAT<br>CCTCTGGATCTTAGGGGCTTTG       |
| 8.     | At5g10360 | RPS6BFP<br>RPS6BRP    | GCCGCGTCGAGAGCATTTTAT<br>GAAACCTTGCTTGTCACATCCT        |
| 9.     | At3g02560 | RPS7BFP<br>RPS7BRP    | TGGAACACCGAAGCTCTGGATTAAC<br>GGTGCAACACCCTTATCCTTGTGG  |
| 10.    | At5g20290 | RPS8AFP<br>RPS8ARP    | TCGGCGACAATGGGTATTTCTCG<br>CAACGCACGCCACTTAACATTTCC    |
| 11.    | At4g12160 | RPS9 FP<br>RPS9RP     | GGAGCGTCGTCTTCAGACTATT<br>GTGCTAGCTTCCAAGAGTGTTCTC     |
| 12.    | At4g25740 | RPS10FP<br>RPS10RP    | AAGCTCAACCAACAAGACG<br>AGCAGGGACAACATCGGAAGG           |
| 13.    | At3g48930 | RPS11FP<br>RPS11RP    | TACTTGCCACAGTGCGAAAATGC<br>GCCGGAATGTTTGAATGCCTCT      |
| 14.    | At1g15930 | RPS12AFP<br>RPS12ARP  | TGCTGATCACGAAGTCAGGTTGC<br>CTCGCCGAAGTCCTTGACAACA      |
| 15.    | At3g60770 | RPS13 FP<br>RPS13 RP  | AGCAGCAGCCGTAAGAAAGAA<br>AGCAGATGCCGAGATACCC           |
| 16.    | At2g36160 | RPS14A FP<br>RPS14ARP | CCTGGAGCACAGTCTGCCCTTAGA<br>CCACAATGCGAGAAAACTCAGAGC   |
| 17.    | At1g04270 | RPS15A FP<br>RPS15ARP | CCTCTCAGCAGCCAACGACAGTTAT<br>CCCTTTTCGCTTTCCTCAGCTTC   |

|     |           |                         |                                                       |
|-----|-----------|-------------------------|-------------------------------------------------------|
| 18. | At1g07770 | RPS15aA FP<br>RPS15aARP | GCCACGTTTTGATGTTGGTGTC<br>CCAGCAGATGTAGTCAGCACGATG    |
| 19. | At5g18380 | RPS16C FP<br>RPS16CRP   | TACGCCATCCGTCAGAGTATC<br>AGCAGAGTCCTATCATACCTCACC     |
| 20. | At2g05220 | RPS17BFP<br>RPS17BRP    | ATCTCTGTCTCCGGTAAGTCACTG<br>ACTGGTCCCTTCTGGATACGTT    |
| 21. | At1g22780 | RPS18 FP<br>RPS18 RP    | GTTGCTAACCCTCGCCAGTTCA<br>ACACGGAGACCCCAGTAGTGC       |
| 22. | At3g02080 | RPS19 FP<br>RPS19 RP    | TGGAAGCAAGAGGAACGGTA<br>TCCCTTTGGCCACTGGAAGTGA        |
| 23. | At3g47370 | RPS20 FP<br>RPS20 RP    | CTCCGCAGTTGCACACAAATT<br>TGGGCTTCATCGGTTTCATACGC      |
| 24. | At3g09680 | RPS23 FP<br>RPS23 RP    | ACGTCGCGCCTTTAGCAGTTTC<br>TCCGCCCACCTCTGAGTAATCC      |
| 25. | At5g28060 | RPS24 FP<br>RPS24 RP    | TGGCGGAAAAAGCTGTCACT<br>TTTGAAACATTGGCTCTTC           |
| 26. | At2g16360 | RPS25AFP<br>RPS25ARP    | CGGTGGCGGAAAGCAGAAAAAG<br>CAAGCGACCCATTGATCCGAAG      |
| 27. | At2g40510 | RPS26 FP<br>RPS26 RP    | CGGCAACAAGAGCGTAAACCC<br>TCGGCAATGTGTATCCCTCAT        |
| 28. | At2g45710 | RPS27A FP<br>RPS27A RP  | CGGTTGATTCCATACGATCTCCAAG<br>CGAATTGGGTGATTGAACAAGACG |
| 29. | At1g23410 | RPS27BFP<br>RPS27B RP   | GGTTCTACGTCTGAGAGGAG<br>CCACAATAACAGAAGGACAC          |
| 30. | At3g10090 | RPS28 FP<br>RPS28 RP    | TCTACCCATCGCAGAGCCTC<br>CTCCAGCAAGGTGAGAATATC         |
| 31. | At3g43980 | RPS29AFP<br>RPS29ARP    | GGGTCACCTAATGTCTGGAAGTC<br>GTTACTGCGGAAACACTGTCTG     |
| 32. | At2g19750 | RPS30 FP<br>RPS30 RP    | GGTGAGAGGTCAGACACCT<br>GAGTTTGGTCCTCTCTTCTTGC         |
| 33. | At1g43170 | RPL3 FP<br>RPL3 RP      | GAAGGCGTTCCCTAAGGATG<br>GTGCCCAGACAGTGTTCAAAG         |
| 34. | At3g09630 | RPL4AFP<br>RPL4ARP      | GAGGAAAACCGTTACCAAGGAGGAG<br>CTGCTGGGGTAAACCAAAGAAAGC |
| 35. | At3g25520 | RPL5AFP<br>RPL5ARP      | TGTTCCGGTGCTCTTAAGGGTGCTT<br>TGGGTTGGGGTCAGCACGAATAG  |
| 36. | At1g18540 | RPL6 FP<br>RPL6 RP      | GGCGAAGAGGACTCCCAAG<br>AGTGATGCTGGCTTTTAGCTT          |
| 37. | At1g80750 | RPL7FP<br>RPL7RP        | GGATGCACAATCATTGAGGGAAATC<br>TCTTCCGGTGCAAAACATCAGC   |
| 38. | At2g47610 | RPL7a FP<br>RPL7a RP    | GGTCCCTCCAGCTCTTAACCAA<br>CACATGGTTGAGGCCGTATTT       |
| 39. | At2g18020 | RPL8FP<br>RPL8RP        | CGGCGAGAGAAATGGTTACCTCA<br>TCGAACCCGATGGCAACTTAATC    |
| 40. | At1g33120 | RPL9 FP<br>RPL9 RP      | TGTTGGATGGTGTAACCATTTG<br>GTGGATTTGGTCCATAAAAC        |
| 41. | At1g08360 | RPL10a FP<br>RPL10a RP  | CCACATATCCCCCGTCCTAA<br>CCATGCACAGAACCTTCTTCAG        |
| 42. | At2g42740 | RPL11AFP                | GATCGCATGCTATGTAACCGTCAGA                             |

|     |           |                        |                                                       |
|-----|-----------|------------------------|-------------------------------------------------------|
|     |           | RPL11ARP               | TAGCCAGGACGTTCTAGGACCACA                              |
| 43. | At2g37190 | RPL12AFP<br>RPL12ARP   | CGGAGAGAGATAGGAAGAAGGTG<br>CCACAGTACAACCAACAGACACAC   |
| 44. | At3g48130 | RPL13FP<br>RPL13RP     | GGCGTATAAACTCTTCGTGTAGC<br>GACGCTCACTTCTTCTCTTCGT     |
| 45. | At3g07110 | RPL13a FP<br>RPL13a RP | TGGGTTCGCCTTTCTTCTGAAGTCG<br>GGAGGCGCATGACAAAAGACG    |
| 46. | At2g20450 | RPL14FP<br>RPL14RP     | TACGGCGAGGATTATGGAAAGCTC<br>GGCCAACATGATCTTGAACCTGTCA |
| 47. | At4g17390 | RPL15FP<br>RPL15RP     | CGTGTTCGAGTCAGACGTGGTG<br>CCTGCGGGAAGGTCTGTTCTTG      |
| 48. | At1g27400 | RPL17aFP<br>RPL17aRP   | TCAGGCAAAGAACAGGCATTCTG<br>GATGTGAGAAATGAAAAGGGCATCG  |
| 49. | At2g47570 | RPL18FP<br>RPL18RP     | CTCTCTCGTCTGGTCCGATACATGG<br>GCGCTCTCAGTGAACCTCAATGC  |
| 50. | At1g29970 | RPL18a FP<br>RPL18a RP | GCAACCACAGCATCCGAT<br>CGCGGTGATCAACAGATGTGAC          |
| 51. | At3g16780 | RPL19FP<br>RPL19RP     | AGGGTCGTCACTCTGGATACGGTAA<br>GCCTTCTCAGCCTTCATCTTGTGG |
| 52. | At1g09590 | RPL21 FP<br>RPL21 RP   | GCGAGAACGAGGGATCTGTTCTG<br>CTCCTCGGCACATCTTGACTGC     |
| 53. | At5g27770 | RPL22FP<br>RPL22RP     | CAGGAGAGGATTAAGGTTGGTG<br>CTTCTTCCTCAGCTTCGTTCTC      |
| 54. | At1g04480 | RPL23FP<br>RPL23RP     | CGACGGTGAAGTGTGCCGATAA<br>CCTTGGGGTTGACAATGACTCCA     |
| 55. | At2g39460 | RPL23a FP<br>RPL23a RP | AAGGCTGTGAAGTCTGGTCAAG<br>CCAGTTCTAGGCTTGGTAAGAGTC    |
| 56. | At2g36620 | RPL24 FP<br>RPL24 RP   | TCGATTGTCTGGTGCTACTTTGG<br>CCACCACCACCCATCTTAGCAG     |
| 57. | At3g49910 | RPL26AFP<br>RPL26ARP   | GATAATGAGCTCTCCTCTCTCCAC<br>CTTCACGTCCCTTGTAAGTACCAC  |
| 58. | At1g12960 | RPL27a FP<br>RPL27a RP | CGCCGGTGTTGGTATGAGGTATT<br>CCGGCAAGAAACCTTTCCCTAAA    |
| 59. | At2g19730 | RPL28FP<br>RPL28RP     | GGAATTCCCCAGGATGTCAAAGG<br>GCTGATGGCGCTGAGTCTAGCA     |
| 60. | At3g06700 | RPL29FP<br>RPL29RP     | CGAGCAGATCTACCTCTCTCTCTC<br>GGAAGTTAGGGTCCATTCTCTCT   |
| 61. | At1g77940 | RPL30BFP<br>RPL30BRP   | CCACCGCACAGATCCAAGACAT<br>CGCAAGCTGTTCCCAAATCAACG     |
| 62. | At2g19740 | RPL31aFP<br>RPL31aRP   | CTCCAACACCATTTCGAAGACCAG<br>CGGGCAACACGGACTCTAATTCTC  |
| 63. | At4g18100 | RPL32 FP<br>RPL32 RP   | GCGGTCCCATTTGCTTACCAAGAA<br>AACATTGGGCATCAAAGTCACAC   |
| 64. | At1g26880 | RPL34 FP<br>RPL34 RP   | TGGCCCCAAATGTCCTGTTACTG<br>CCCGAATGATCCTTTCCCTGACTG   |
| 65. | At3g09500 | RPL35FP<br>RPL35RP     | GCTCTCCTCCGTGTCTGCTAAAGTC<br>TGGTGAGGCGTCTACGAATAGCA  |
| 66. | At1g06980 | RPL35aFP<br>RPL35aRP   | CCTCGTCTTCTCCAAGTTGTTC<br>CTTAGGCTGTTTCCCATCTCTCTC    |



|     |           |                            |                                                      |
|-----|-----------|----------------------------|------------------------------------------------------|
| 67. | At2g37600 | RPL36FP<br>RPL36RP         | TCGTTGGATTGAACAAAGGACACG<br>CACGCTTGTCTTTCCCAACCTTGA |
| 68. | At3g23390 | RPL36a FP<br>RPL36a RP     | AGATCAGAGACGCGAAAATGGT<br>TCACCACCGATCTCGAAATGCTT    |
| 69. | At1g15250 | RPL37FP<br>RPL37RP         | GCGGCAATGGGTAAAGGAACAG<br>TGAACCTTCGAGGGACATTACGG    |
| 70. | At2g43460 | RPL38AFP<br>RPL38ARP       | GGCGGCTAGTTTCAACCAACAGA<br>TGCAAAGGATTTCGTCACCAAAGGA |
| 71. | At2g25210 | RPL39 FP<br>RPL39 RP       | GGCCCAGAACAAAGATCGCAAGA<br>CCTGATGGTGTGTCGGTACGAA    |
| 72. | At2g36170 | RPL40 FP<br>RPL40 RP       | TTGCATCTTGTCTGAGGCTTA<br>TGGCCTCAACTGGTTGCTATGG      |
| 73. | At3g08520 | RPL41 FP<br>RPL41RP        | ACAGCTTCTGCGAATCAGC<br>CGAATCTACTTAGATCGCTGTC        |
| 74. | At3g18780 | AtActin2 FP<br>AtActin2 RP | CAGCAGATGTGGATCTCCAAGG<br>CGCAGACGTAAGTAAAAACCC      |

**Table. S4. List of primers used in genotyping of T-DNA mutants**

| S. No. | T-DNA lines             | Primer details                                                                                                                                                                              |
|--------|-------------------------|---------------------------------------------------------------------------------------------------------------------------------------------------------------------------------------------|
| 1.     | SALK_138622 (TOR)       | LP 5' AACCCTTACATGACATGCTCG 3' Len 21 TM 60.01 GC 47.62, PRODUCT_SIZE 1054<br>RP 5' AATCACCTGCATAACACGCTC 3' Len 21 TM 60.15 GC 47.62<br>Insertion chr1 18524835 BP+RP_PRODUCT_SIZE 430-730 |
| 2.     | SALK_091329 (RPL23)     | LP 5' GCAAAGTTGCTGGAATTGAAG 3' Len 21 TM 59.87 GC 42.86, PRODUCT_SIZE 1156<br>RP 5' ACCCACTCACCCTGAATCTG 3' Len 21 TM 60.02 GC 52.38<br>Insertion chr2 16475960 BP+RP_PRODUCT_SIZE 489-789  |
| 3.     | SALK_113295 (S6K1)      | LP 5' TCTGTATCGATTTTCCCGTG 3' Len 21 TM 59.95 GC 42.86, PRODUCT_SIZE 1105<br>RP 5' TTTCAGGTGCCATATACTCCG 3' Len 21 TM 59.97 GC 47.62<br>Insertion chr3 2652628 BP+RP_PRODUCT_SIZE 452-752   |
| 4.     | SALK_134424 C (RPL18)   | LP 5' GTGGGAGGTCTAACCTTCCTG 3' Len 21 TM 59.98 GC 57.14, PRODUCT_SIZE 1194<br>RP 5' CACAAAAAGTTCCCCAAAAGC 3' Len 21 TM 60.84 GC 42.86<br>Insertion chr1 10499225 BP+RP_PRODUCT_SIZE 588-888 |
| 5.     | SALK_064513 (RPL24)     | LP 5' AAAACATTTCTTTCATGGGCC 3' Len 21 TM 60.18 GC 38.10, PRODUCT_SIZE 1200<br>RP 5' GAAAGAAACAAACCGTAGGGC 3' Len 21 TM 59.99 GC 47.62<br>Insertion chr2 15351229 BP+RP_PRODUCT_SIZE 553-853 |
| 6.     | Emb2394, CS16176 (RPL6) | LP 5' ATTCCGCTAGGGTTTCGTTT 3' Len 20 TM 59.69 GC 55, PRODUCT_SIZE 1201<br>RP 5' TTGAGCAAAAGGTGTGCTTG 3' Len 21 TM 59.28 GC 47.62<br>Insertion chr1 1503483 BP+RP_PRODUCT_SIZE 370-670       |

|     |                                          |                                                                                                                                                                                                |
|-----|------------------------------------------|------------------------------------------------------------------------------------------------------------------------------------------------------------------------------------------------|
| 7.  | SALKseq_094<br>189<br>(RPS28)            | LP 5' GAATCAATCGGTTCGTGACTG 3' Len 21 TM 60.51 GC 47.62,<br>PRODUCT_SIZE 1271<br>RP 5' TACCAACCAGAGCTCAAATTG 3' Len 21 TM 57.89 GC 42.86<br>Insertion chr5 25668245 BP+RP_PRODUCT_SIZE 594-894 |
| 8.  | LBb1.3                                   | 5' ATTTTGCCGATTTCGGAAC 3'                                                                                                                                                                      |
| 9.  | LBa1 of pBIN-<br>pROK2 for<br>SALK lines | 5' TGGTTCACGTAGTGGGCCATCG 3'                                                                                                                                                                   |
| 10. | LB_6313R for<br>SALK lines               | 5' TCAAACAGGATTTTCGCCTGCT 3'                                                                                                                                                                   |

**Table S5. List of primers used in RT-qPCR of the T-DNA insertion in the SALK lines**

| S. No. | Gene                                                         | Accession | Primer Sequence (5'-3')                             |
|--------|--------------------------------------------------------------|-----------|-----------------------------------------------------|
| 1.     | <i>TORFP</i> (Kinase domain)<br><i>TORRP</i> (Kinase domain) | At1g50030 | TACGACCATACAGGAAAGAGCAT<br>TTCTATCAAGGGCAACTGGTTTA  |
| 2.     | <i>S6K1FP</i><br><i>S6K1RP</i>                               | At3g08730 | GGAGCGTAGGGATTCTTCTGTAT<br>TCTGCTGTATCTTTCCTTTGCTC  |
| 3.     | <i>RPL6FP</i><br><i>RPL6RP</i>                               | At1g05190 | TTCTTGTCATCCAATGAAGTCCT<br>CTATCCGGTATCTGCATCTTCAC  |
| 4.     | <i>RPL18FP</i><br><i>RPL18RP</i>                             | At1g29965 | ATATTTTGTCGTTCTGTGCTT<br>TCCACTGCTCCATTCAAAGTAGT    |
| 5.     | <i>RPL23FP</i><br><i>RPL23RP</i>                             | At2g39460 | TCAATCCAAAGCTTACTGGGTTA<br>AGCGAAGCTCAGTAATGAATCTG  |
| 6.     | <i>RPL24FP</i><br><i>RPL24RP</i>                             | At2g36620 | AGCCATGGTTCTCAAGTAATCAA<br>TTTCTGATCGGGAAATAAACAGA  |
| 7.     | <i>RPS28FP</i><br><i>RPS28RP</i>                             | At5g64140 | ATTCCACCATATCCCAATTCTCT<br>TGCGTCATAAAAGATTTCATTCCT |

**Table S6. Identification of the predicted functionally interacting partners of TOR-S6K-RP signaling for ribosome biogenesis**

| PPI network                 | Predicted Functionally interacting Partners | Gene                                            | Function                                                                                                   |
|-----------------------------|---------------------------------------------|-------------------------------------------------|------------------------------------------------------------------------------------------------------------|
| <b>PK1/S6K1 (AT3G08730)</b> | AT1G18080.1,<br>ATARCA                      | Transducin/WD40 repeat-like superfamily protein | Major component of the RACK1 regulatory proteins that play a role in multiple signal transduction pathways |
|                             | AT1G02830                                   | Putative 60S ribosomal protein L22-1/L22e       | Its function is described as structural constituent of                                                     |

|  |                        |                                                                 |                                                                                                                                     |
|--|------------------------|-----------------------------------------------------------------|-------------------------------------------------------------------------------------------------------------------------------------|
|  |                        | family                                                          | ribosome                                                                                                                            |
|  | AT1G15930              | Ribosomal protein L7Ae/L30e/S12e/Gadd45 family protein          | Its function is described as structural constituent of ribosome;;                                                                   |
|  | AT1G12960              | Ribosomal protein L18e/L15 superfamily protein                  | Ribosome assembly                                                                                                                   |
|  | AT1G02780.1, emb2386   | Ribosomal protein L19e family protein                           | Embryo defective 2386 (emb2386) is structural constituent of ribosome                                                               |
|  | AT1G14320.1, SAC52     | Ribosomal protein L16p/L10e family protein.                     | Involved in translational regulation                                                                                                |
|  | AT1G08360              | Cyt Ribosomal protein L1p/L10e family                           | Structural constituent of ribosome, RNA binding; Involved in translation, RNA processing                                            |
|  | AT1G04270.1, RIG       | Encodes cytosolic ribosomal protein S15                         | Ribosome assembly                                                                                                                   |
|  | AT1G01100              | 60S acidic ribosomal protein family                             | Plays an important role in the elongation step of protein synthesis                                                                 |
|  | AT1G07070              | Ribosomal protein L35Ae family protein                          | Structural constituent of ribosome; Involved in translation, ribosome biogenesis                                                    |
|  | AT2G24050.1, eIFiso4G2 | MIF4G domain-containing protein / MA3 domain-containing protein | Plays a role in the accumulation of some potyvirus during viral infection                                                           |
|  | AT3G60240.4, EIF4G     | Eukaryotic translation initiation factor 4G                     | Component of the protein complex eIF4F, which is involved in the recognition of the mRNA cap,                                       |
|  | AT1G62410              | MIF4G domain-containing protein                                 | Translation initiation factor activity; Involved in translation, RNA metabolic process;                                             |
|  | AT5G10360.1, EMB3010   | 40S ribosomal protein S6-2                                      | Play an important role in controlling cell growth and proliferation through the selective translation of particular classes of mRNA |
|  | AT4G31700.1, RPS6A     | 40S ribosomal protein S6-1                                      | Controls cell growth and proliferation through the selective translation of particular classes of mRNA                              |

|                                    |                      |                                                              |                                                                                                                                                          |
|------------------------------------|----------------------|--------------------------------------------------------------|----------------------------------------------------------------------------------------------------------------------------------------------------------|
|                                    | AT3G08850.1, RAPTOR1 | HEAT repeat ;WD domain, G-beta repeat protein                | RAPTOR proteins are binding partners of the target of rapamycin kinase that is present in all eukaryotes                                                 |
|                                    | AT3G10540            | 3-phosphoinositide-dependent protein kinase                  | Involved in protein amino acid phosphorylation;                                                                                                          |
|                                    | AT5G04510.1, PDK1    | 3'-phosphoinositide-dependent protein kinase 1               | Couple lipid signals to the activation-loop phosphorylation of several protein kinases of the so-called AGC kinase family.                               |
|                                    | AT1G50030.1, TOR     | Serine/threonine-protein kinase TOR                          | Essential cell growth regulator that controls development from early embryo to seed production.                                                          |
| <b>RPL6 (AT1G05190.1), emb2394</b> | AT1G79850.1, RPS17   | 30S ribosomal protein S17, chloroplastic;                    | One of the primary rRNA binding proteins, it binds specifically to the 5'-end of 16S ribosomal RNA                                                       |
|                                    | AT2G24090.1, PRPL35  | 50S ribosomal protein L35, chloroplastic;                    | Structural constituent of ribosome; Involved in translation; Located in ribosome, chloroplast;                                                           |
|                                    | AT1G75350.1, emb2184 | 50S ribosomal protein L31, chloroplastic; Binds the 23S rRNA |                                                                                                                                                          |
|                                    | AT1G74970.1, RPS9    | Ribosomal protein S9                                         | Component of the chloroplast ribosome                                                                                                                    |
|                                    | AT1G32990.1, PRPL11  | 50S ribosomal protein L11, chloroplastic                     | Involved in Photosynthesis                                                                                                                               |
|                                    | AT2G33800.1, EMB3113 | 30S ribosomal protein S5, chloroplastic                      | Binds directly to 16S ribosomal RNA                                                                                                                      |
|                                    | AT3G44890.1, RPL9    | 50S ribosomal protein L9, chloroplastic;                     | Plastid ribosomal protein CL9                                                                                                                            |
|                                    | AT1G07320.1, RPL4    | 50S ribosomal protein L4, chloroplastic                      | Binds directly and specifically to 23S rRNA and play a role in plastid transcriptional regulation, Belongs to the universal ribosomal protein uL4 family |
|                                    | AT2G33450.1, PRPL28  | 50S ribosomal protein L28, chloroplastic                     | Structural constituent of ribosome                                                                                                                       |
|                                    | AT5G40950.1, RPL27   | 50S ribosomal protein L27, chloroplastic                     | Structural constituent of ribosome; Involved in translation in thylakoid,                                                                                |



|                             |                      |                                                                        |                                                                                                                                             |
|-----------------------------|----------------------|------------------------------------------------------------------------|---------------------------------------------------------------------------------------------------------------------------------------------|
|                             |                      |                                                                        | ribosome, chloroplast stroma, chloroplast;                                                                                                  |
|                             | AT1G78630.1, emb1473 | 50S ribosomal protein L13, chloroplastic                               | Structural constituent of ribosome; Involved in translation, embryo development ending in seed dormancy                                     |
|                             | AT3G25920.1, RPL15   | Encodes a plastid ribosomal protein CL15,                              | A constituent of the large subunit of the ribosomal complex; Belongs to the universal ribosomal protein uL15 family                         |
|                             | RPL27, AT5G40950.1   | 50S ribosomal protein L27 chloroplastic                                | Structural constituent of ribosome                                                                                                          |
|                             | AT3G54210            | 50S ribosomal protein L17, chloroplastic                               | Directly binds 23S ribosomal RNA                                                                                                            |
|                             | AT5G65220            | 50S ribosomal protein L29, chloroplastic                               | Structural constituent of ribosome, involved in translation, ribosome biogenesis                                                            |
|                             | AT2G43030            | 50S ribosomal protein L3-1, chloroplastic                              | One of the primary rRNA binding proteins, it binds directly near the 3'-end of the 23S rRNA, where it nucleates assembly of the 50S subunit |
|                             | AT1G35680.1, RPL21C  | 50S ribosomal protein L21, chloroplastic                               | Binds to 23S ribosomal RNA in the presence of protein L20                                                                                   |
|                             | AT3G54210            | 50S ribosomal protein L17, chloroplastic                               | Directly binds to 23S ribosomal RNA                                                                                                         |
|                             | AT1G48350.1, EMB3105 | 50S ribosomal protein L18, chloroplastic                               | Binds 5S rRNA, forms part of the central protuberance of the 50S subunit                                                                    |
|                             | AT3G15190.1, PRPS20  | Chloroplast 30S ribosomal protein S20, putative                        | Binds directly to 16S ribosomal RNA; Belongs to the bacterial ribosomal protein bS20 family                                                 |
|                             | AT1G64510            | Translation elongation factor EF1B/ribosomal protein S6 family protein | Binds together with S18 to 16S ribosomal RNA                                                                                                |
|                             | AT4G01310            | 50S ribosomal protein L5, chloroplastic                                | Binds 5S rRNA, forms part of the central protuberance of the 50S subunit                                                                    |
| <b>RPL18 (AT3G05590.1),</b> | AT1G18080.1, ATARCA  | Transducin/WD40 repeat-like superfamily protein                        | Major component of the RACK1 regulatory proteins that play a role in                                                                        |

|  |                      |                                                                        |                                                                                                                                                                                                                                 |
|--|----------------------|------------------------------------------------------------------------|---------------------------------------------------------------------------------------------------------------------------------------------------------------------------------------------------------------------------------|
|  |                      |                                                                        | multiple signal transduction pathways.                                                                                                                                                                                          |
|  | AT1G07070            | Ribosomal protein L35Ae family protein                                 | Structural constituent of ribosome                                                                                                                                                                                              |
|  | AT1G15930            | Ribosomal protein L7Ae/L30e/S12e/Gadd 45 family protein                | Structural constituent of ribosome, involved in response to cadmium ion, response to salt stress, translation                                                                                                                   |
|  | AT1G12960            | Ribosomal protein L18e/L15 superfamily protein                         | Structural constituent of ribosome                                                                                                                                                                                              |
|  | AT1G33120.1, RPL9B   | Ribosomal protein L6 family                                            | Structural constituent of ribosome, rRNA binding, involved in translation                                                                                                                                                       |
|  | AT1G02780.1, emb2386 | Ribosomal protein L19e family protein; Embryo defective 2386 (emb2386) | Structural constituent of ribosome, involved in translation, ribosome biogenesis, embryo development ending in seed dormancy                                                                                                    |
|  | AT1G14320.1, SAC52   | Ribosomal protein L16p/L10e family protein                             | Involved in translational regulation. Contribute to general translation under UV-B stress. Involved in the NIK1-mediated defense response to geminivirus infection. Acts coordinately with LIMYB as a transcriptional repressor |
|  | AT1G27400            | Ribosomal protein L22p/L17e family protein                             | Structural constituent of ribosome, involved in translation                                                                                                                                                                     |
|  | AT1G15250            | Zinc-binding ribosomal protein family protein                          | Binds to the 23S rRNA                                                                                                                                                                                                           |
|  | AT1G01100            | 60S acidic ribosomal protein family                                    | Plays an important role in the elongation step of protein synthesis                                                                                                                                                             |
|  | AT1G18540            | Ribosomal protein L6 family protein                                    | Structural constituent of ribosome                                                                                                                                                                                              |
|  | AT1G09590            | Translation protein SH3-like family protein                            | Structural constituent of ribosome                                                                                                                                                                                              |
|  | AT1G23290.1, RPL27AB | Encodes a ribosomal protein L27A,                                      | Regulated by TCP20, Belongs to the universal ribosomal protein uL15 family                                                                                                                                                      |
|  | AT1G09590.1, RPL21A  | Translation protein SH3-like family protein                            | Structural constituent of ribosome                                                                                                                                                                                              |

|                              |                     |                                                        |                                                                                                                                                                                           |
|------------------------------|---------------------|--------------------------------------------------------|-------------------------------------------------------------------------------------------------------------------------------------------------------------------------------------------|
|                              | AT1G36240           | Ribosomal protein L7Ae/L30e/S12e/Gadd45 family protein | Ribosomal constituent                                                                                                                                                                     |
|                              | AT1G08360           | Ribosomal protein L1p/L10e family                      | Structural constituent of ribosome, involved in RNA binding; RNA processing; translation                                                                                                  |
|                              | AT1G33140.1, PGY2   | Encodes ribosomal protein L9                           | Identified in a screen for enhancers of as1. as1/pgy double mutants show defects in leaf vascular patterning and adaxial cell fate. Belongs to the universal ribosomal protein uL6 family |
|                              | AT1G41880           | Ribosomal protein L35Ae family protein                 | Structural constituent of ribosome                                                                                                                                                        |
|                              | AT1G26910.1, RPL10B | Ribosomal protein L16p/L10e family protein             | Structural constituent of ribosome, involved in response to UV-B, developmental process, translation                                                                                      |
| <b>RPL23.1 (ATCG00840.1)</b> | ATCG01230.1, RPS12B | 30S ribosomal protein S12, chloroplastic               | The gene is located in three distinct loci on the chloroplast genome and is transcribed to make one transcript                                                                            |
|                              | ATCG00905.1, RPS12C | Chloroplast gene encoding ribosomal protein s12        | The gene is located in three distinct loci on the chloroplast genome and is transcribed to make one transcript                                                                            |
|                              | AT3G25520.1, RPL5A  | 60S ribosomal protein L5-1<br>:                        | Component of the ribosome, a large ribonucleoprotein complex responsible for the synthesis of proteins in the cell                                                                        |
|                              | ATCG01310.1, RPL2.2 | Encodes a chloroplast ribosomal protein L2             | A constituent of the large subunit of the ribosomal complex, belongs to the universal ribosomal protein uL2 family                                                                        |
|                              | AT3G60245           | Zinc-binding ribosomal protein family protein          | Structural constituent of ribosome                                                                                                                                                        |
|                              | RPL23.2             | One of two chloroplast gene that encodes RPL23         | A constituent of Large subunit of the ribosomal complex                                                                                                                                   |
| <b>RPL24</b>                 | AT2G33450.1,        | 50S ribosomal protein                                  | Structural constituent of                                                                                                                                                                 |

|                |                      |                                          |                                                                                                                                                                                                                                                                                                                                      |
|----------------|----------------------|------------------------------------------|--------------------------------------------------------------------------------------------------------------------------------------------------------------------------------------------------------------------------------------------------------------------------------------------------------------------------------------|
| (AT5G54600.1), | PRPL28               | L28, chloroplastic                       | ribosome                                                                                                                                                                                                                                                                                                                             |
|                | AT1G32990.1, PRPL11  | 50S ribosomal protein L11, chloroplastic | Mutant has Decreased effective quantum yield of photosystem II; Pale green plants; Reduced growth rate                                                                                                                                                                                                                               |
|                | AT3G44890.1, RPL9    | 50S ribosomal protein L9, chloroplastic  | Plastid ribosomal protein CL9                                                                                                                                                                                                                                                                                                        |
|                | AT1G78630.1, emb1473 | 50S ribosomal protein L13, chloroplastic | Embryo defective 1473 (emb1473), structural constituent of ribosome embryo development ending in seed dormancy                                                                                                                                                                                                                       |
|                | AT2G24090.1, PRPL35  | 50S ribosomal protein L35, chloroplastic | Structural constituent of ribosome                                                                                                                                                                                                                                                                                                   |
|                | AT3G25920.1, RPL15   | Encodes a plastid ribosomal protein CL15 | A constituent of the large subunit of the ribosomal complex                                                                                                                                                                                                                                                                          |
|                | AT3G54210            | 50S ribosomal protein L17, chloroplastic | Binds directly to 23S ribosomal RNA                                                                                                                                                                                                                                                                                                  |
|                | AT5G40950.1, RPL27   | 50S ribosomal protein L27, chloroplastic | Ribosomal protein large subunit 27 (RPL27) structural constituent of ribosome                                                                                                                                                                                                                                                        |
|                | AT2G38140.1, PSRP4   | 30S ribosomal protein S31, chloroplastic | Plastid-specific ribosomal protein 4 (PSRP4) mRNA, complete, belongs to the bacterial ribosomal protein bTHX family                                                                                                                                                                                                                  |
|                | AT1G79850.1, RPS17   | 30S ribosomal protein S17, chloroplastic | One of the primary rRNA binding proteins, it binds specifically to the 5'-end of 16S ribosomal RNA. Required for optimal plastid performance in terms of photosynthesis and growth. Required for the translation of plastid mRNAs. Plays a critical role in biosynthesis of thylakoid membrane proteins encoded by chloroplast genes |
|                | AT1G74970.1, RPS9    | Ribosomal protein S9,                    | A nuclear encoded component of the chloroplast ribosome                                                                                                                                                                                                                                                                              |

|                            |                      |                                                                        |                                                                                                                                             |
|----------------------------|----------------------|------------------------------------------------------------------------|---------------------------------------------------------------------------------------------------------------------------------------------|
|                            | AT1G07320.1, RPL4    | 50S ribosomal protein L4, chloroplastic                                | Binds directly and specifically to 23S rRNA). May play a role in plastid transcriptional regulation;                                        |
|                            | AT1G35680.1, RPL21C  | 50S ribosomal protein L21, chloroplastic                               | Binds to 23S ribosomal RNA in the presence of protein L20                                                                                   |
|                            | AT2G43030            | 50S ribosomal protein L3-1, chloroplastic                              | One of the primary rRNA binding proteins, it binds directly near the 3'-end of the 23S rRNA, where it nucleates assembly of the 50S subunit |
|                            | AT1G05190.1, emb2394 | 50S ribosomal protein L6, chloroplastic                                | Binds directly to 23S ribosomal RNA and is located at the aminoacyl-tRNA binding site of the peptidyltransferase center                     |
|                            | AT2G33800.1, EMB3113 | 30S ribosomal protein S5, chloroplastic                                | Binds directly to 16S ribosomal RNA                                                                                                         |
|                            | AT1G64510            | Translation elongation factor EF1B/ribosomal protein S6 family protein | Binds together with S18 to 16S ribosomal RNA                                                                                                |
|                            | AT4G01310            | 50S ribosomal protein L5, chloroplastic                                | Binds 5S rRNA, forms part of the central protuberance of the 50S subunit                                                                    |
|                            | AT3G15190.1, PRPS20  | Chloroplast 30S ribosomal protein S20, putative                        | Binds directly to 16S ribosomal RNA; Belongs to the bacterial ribosomal protein bS20 family                                                 |
|                            | AT1G48350.1, EMB3105 | 50S ribosomal protein L18, chloroplastic                               | Binds 5S rRNA, forms part of the central protuberance of the 50S subunit                                                                    |
| <b>RPS28 (AT5G64140.1)</b> | AT1G18080.1, ATARCA  | Transducin/WD40 repeat-like superfamily protein                        | Major component of the RACK1 regulatory proteins that play a role in multiple signal transduction pathways                                  |
|                            | AT1G04270.1, RIG     | Encodes cytosolic ribosomal protein S15                                | Belongs to the universal ribosomal protein uS19 family                                                                                      |
|                            | AT1G15930            | Ribosomal protein L7Ae/L30e/S12e/Gadd45 family protein                 | Structural constituent of ribosome, involved in response to cadmium ion, response to salt stress, translation                               |

|  |                         |                                                                                  |                                                                                                                                                                                                                                                                  |
|--|-------------------------|----------------------------------------------------------------------------------|------------------------------------------------------------------------------------------------------------------------------------------------------------------------------------------------------------------------------------------------------------------|
|  | AT1G09590               | Translation protein<br>SH3-like family protein                                   | Structural constituent of<br>ribosome                                                                                                                                                                                                                            |
|  | AT1G14320.1,<br>SAC52   | Ribosomal protein<br>L16p/L10e family<br>protein                                 | Involved in translational<br>regulation. Contribute to<br>general translation under<br>UV-B stress. Involved in<br>the NIK1- mediated<br>defense response to<br>geminivirus infection.<br>Acts coordinately with<br>LIMYB as a<br>transcriptional repressor      |
|  | AT1G02780.1,<br>emb2386 | Ribosomal protein L19e<br>family protein; Embryo<br>defective 2386<br>(emb2386); | Structural constituent of<br>ribosome. Involved in<br>translation, ribosome<br>biogenesis, embryo<br>development                                                                                                                                                 |
|  | AT1G15250               | Zinc-binding ribosomal<br>protein family protein                                 | Binds to the 23S rRNA                                                                                                                                                                                                                                            |
|  | AT1G08360               | Ribosomal protein<br>L1p/L10e family                                             | Structural constituent of<br>ribosome, RNA binding                                                                                                                                                                                                               |
|  | AT1G33140.1, PGY2       | Encodes ribosomal<br>protein L9                                                  | Identified in a screen for<br>enhancers of as1. The<br>as1/pgy double mutants<br>show defects in leaf<br>vascular patterning and<br>adaxial cell fate. Double<br>mutant analysis indicates<br>pgy genes function in the<br>same pathway as REV,<br>KAN1 and KAN2 |
|  | AT1G27400               | Ribosomal protein<br>L22p/L17e family<br>protein                                 | Structural constituent of<br>ribosome                                                                                                                                                                                                                            |
|  | AT1G01100               | 60S acidic ribosomal<br>protein family                                           | Plays an important role in<br>the elongation step of<br>protein synthesis                                                                                                                                                                                        |
|  | AT1G41880               | Ribosomal protein<br>L35Ae family protein                                        | Structural constituent of<br>ribosome, involved in<br>translation, ribosome<br>biogenesis                                                                                                                                                                        |
|  | AT1G09590.1,<br>RPL21A  | Translation protein<br>SH3-like family protein                                   | Structural constituent of<br>ribosome                                                                                                                                                                                                                            |
|  | AT1G12960               | Ribosomal protein<br>L18e/L15 superfamily<br>protein                             | Structural constituent of<br>ribosome                                                                                                                                                                                                                            |
|  | AT1G18540               | Ribosomal protein L6<br>family protein                                           | Structural constituent of<br>ribosome                                                                                                                                                                                                                            |
|  | AT1G23290.1,            | Encodes a ribosomal                                                              | A constituent of the large                                                                                                                                                                                                                                       |



|             |                      |                                                                        |                                                                                                                                                                                                                                  |
|-------------|----------------------|------------------------------------------------------------------------|----------------------------------------------------------------------------------------------------------------------------------------------------------------------------------------------------------------------------------|
|             | RPL27AB              | protein L27A                                                           | subunit of the ribosomal complex. Regulated by TCP20; Belongs to the universal ribosomal protein uL15 family                                                                                                                     |
|             | AT1G26880            | Ribosomal protein L34e superfamily protein                             | Structural constituent of ribosome                                                                                                                                                                                               |
|             | AT1G07070            | Ribosomal protein L35Ae family protein                                 | Structural constituent of ribosome                                                                                                                                                                                               |
|             | AT1G33120.1, RPL9B   | Ribosomal protein L6 family                                            | Structural constituent of ribosome, rRNA binding                                                                                                                                                                                 |
| <b>RPS6</b> | AT1G09590.1, RPL21A  | Translation protein SH3-like family protein                            | Structural constituent of ribosome                                                                                                                                                                                               |
|             | AT1G14320.1, SAC52   | Ribosomal protein L16p/L10e family protein                             | Involved in translational regulation. Contribute to general translation under UV-B stress. Involved in the NIK1- mediated defense response to geminivirus infection. Acts coordinately with LIMYB as a transcriptional repressor |
|             | AT1G02830            | Putative 60S ribosomal protein L22-1                                   | Structural constituent of ribosome                                                                                                                                                                                               |
|             | AT1G15250            | Zinc-binding ribosomal protein family protein                          | Binds to the 23S rRNA                                                                                                                                                                                                            |
|             | AT1G15930            | Ribosomal protein L7Ae/L30e/S12e/Gadd 45 family protein                | Structural constituent of ribosome. Involved in response to cadmium ion, response to salt stress, translation                                                                                                                    |
|             | AT1G02780.1, emb2386 | Ribosomal protein L19e family protein; Embryo defective 2386 (emb2386) | Structural constituent of ribosome                                                                                                                                                                                               |
|             | AT1G27400            | Ribosomal protein L22p/L17e family protein                             | Structural constituent of ribosome                                                                                                                                                                                               |
|             | AT1G26910.1, RPL10B  | Ribosomal protein L16p/L10e family protein                             | Involved in response to UV-B, developmental process, translation                                                                                                                                                                 |
|             | AT1G08360            | Ribosomal protein L1p/L10e family                                      | Involved in RNA binding, translation, RNA processing                                                                                                                                                                             |
|             | AT1G18080.1, ATARCA  | Transducin/WD40 repeat-like superfamily protein                        | Major component of the RACK1 regulatory proteins that play a role in                                                                                                                                                             |

|                                                                                                                   |                      |                                                         |                                                                                                                                                                                                            |
|-------------------------------------------------------------------------------------------------------------------|----------------------|---------------------------------------------------------|------------------------------------------------------------------------------------------------------------------------------------------------------------------------------------------------------------|
|                                                                                                                   |                      |                                                         | multiple signal transduction pathways                                                                                                                                                                      |
|                                                                                                                   | AT1G12960            | Ribosomal protein L18e/L15 superfamily protein          | Structural constituent of ribosome                                                                                                                                                                         |
|                                                                                                                   | AT1G01100            | 60S acidic ribosomal protein family                     | Plays an important role in the elongation step of protein synthesis                                                                                                                                        |
|                                                                                                                   | AT1G33140.1, PGY2    | Encodes ribosomal protein L9                            | Identified in a screen for enhancers of as1. as1/pgy double mutants show defects in leaf vascular patterning and adaxial cell fate                                                                         |
|                                                                                                                   | AT1G18540            | Ribosomal protein L6 family protein                     | Structural constituent of ribosome                                                                                                                                                                         |
|                                                                                                                   | AT1G36240            | Ribosomal protein L7Ae/L30e/S12e/Gadd 45 family protein | Structural constituent of ribosome                                                                                                                                                                         |
|                                                                                                                   | AT1G33120.1, RPL9B   | Ribosomal protein L6 family                             | Structural constituent of ribosome, involved in rRNA binding                                                                                                                                               |
|                                                                                                                   | AT1G23290.1, RPL27AB | Encodes a ribosomal protein L27A                        | A constituent of the large subunit of the ribosomal complex. Regulated by TCP20                                                                                                                            |
|                                                                                                                   | AT1G07070            | Ribosomal protein L35Ae family protein                  | Structural constituent of ribosome                                                                                                                                                                         |
|                                                                                                                   | AT1G26880            | Ribosomal protein L34e superfamily protein              | Structural constituent of ribosome                                                                                                                                                                         |
|                                                                                                                   | AT1G04270.1, RIG     | Encodes cytosolic ribosomal protein S15                 | Belongs to the universal ribosomal protein uS19 family                                                                                                                                                     |
| <b>Interaction between the TOR-RPS6A-RPS6B-RPL6-RPL18e-RPL23.1-RPL23.2-RPL24A-RPL24B-RPS28-S6K1-S6K2 proteins</b> | AT3G08850.1, RAPTOR1 | HEAT repeat ;WD domain, G-beta repeat protein           | RAPTOR proteins are binding partners of the target of rapamycin kinase that is present in all eukaryotes and play a central role in the stimulation of cell growth and metabolism in response to nutrients |
|                                                                                                                   | AT3G11400.2, EIF3G1  | Eukaryotic translation initiation factor 3 subunit G    | RNA-binding component of the eukaryotic translation initiation factor 3 (eIF-3) complex, which is involved in protein synthesis of a specialized repertoire of mRNAs and, together with other              |

|  |                        |                                                               |                                                                                                                                                                                                                                                                                                                                                                                                                                                        |
|--|------------------------|---------------------------------------------------------------|--------------------------------------------------------------------------------------------------------------------------------------------------------------------------------------------------------------------------------------------------------------------------------------------------------------------------------------------------------------------------------------------------------------------------------------------------------|
|  |                        |                                                               | initiation factors, stimulates binding of mRNA and methionyl-tRNAi to the 40S ribosome                                                                                                                                                                                                                                                                                                                                                                 |
|  | AT1G18080.1, ATARCA    | Transducin/WD40 repeat-like superfamily protein               | Major component of the RACK1 regulatory proteins that play a role in multiple signal transduction pathways                                                                                                                                                                                                                                                                                                                                             |
|  | AT3G11940.1, RPS5A     | One of two genes encoding the ribosomal protein S5            | Mutants have semi-dominant developmental phenotypes                                                                                                                                                                                                                                                                                                                                                                                                    |
|  | AT1G56070.1, LOS1      | Ribosomal protein S5/Elongation factor G/III/V family protein | Catalyzes the GTP-dependent ribosomal translocation step during translation elongation. During this step, the ribosome changes from the pre-translocational (PRE) to the post-translocational (POST) state as the newly formed A-site-bound peptidyl-tRNA and P-site-bound deacylated tRNA move to the P and E sites, respectively. Catalyzes the coordinated movement of the two tRNA molecules, the mRNA and conformational changes in the ribosome. |
|  | AT1G18080.1, ATARCA    | Transducin/WD40 repeat-like superfamily protein               | Major component of the RACK1, involved in multiple hormone responses and developmental processes. MAPK cascade scaffolding protein involved in the protease IV and ArgC signaling pathway but not the flg22 pathway                                                                                                                                                                                                                                    |
|  | AT2G37270.2, RPS5B     | One of two genes encoding the ribosomal protein S5            | Expressed at a lower level compared to ATRPS5A                                                                                                                                                                                                                                                                                                                                                                                                         |
|  | AT1G09690.1, AT1G09590 | Translation protein SH3-like family protein                   | Structural constituent of ribosome                                                                                                                                                                                                                                                                                                                                                                                                                     |
|  | AT2G40290              | Eukaryotic translation initiation factor 2                    | Functions in the early steps of protein synthesis                                                                                                                                                                                                                                                                                                                                                                                                      |

|  |                      |                                                                              |                                                                                                                                                                                                                                                                                                                                                  |
|--|----------------------|------------------------------------------------------------------------------|--------------------------------------------------------------------------------------------------------------------------------------------------------------------------------------------------------------------------------------------------------------------------------------------------------------------------------------------------|
|  |                      | subunit alpha homolog                                                        | by forming a ternary complex with GTP and initiator tRNA. This complex binds to a 40S ribosomal subunit, followed by mRNA binding to form a 43S pre-initiation complex. Junction of the 60S ribosomal subunit to form the 80S initiation complex is preceded by hydrolysis of the GTP bound to eIF-2 and release of an eIF-2-GDP binary complex. |
|  | AT2G39390            | Ribosomal L29 family protein                                                 | Structural constituent of ribosome                                                                                                                                                                                                                                                                                                               |
|  | AT1G61580.1, RPL3B   | 60S ribosomal protein L3-2, R-protein L3 B (RPL3B)                           | Structural constituent of ribosome                                                                                                                                                                                                                                                                                                               |
|  | AT1G33120.1, RPL9B   | Ribosomal protein L6 family                                                  | Structural constituent of ribosome, rRNA binding                                                                                                                                                                                                                                                                                                 |
|  | AT2G42740.1, RPL16A  | Ribosomal protein large subunit 16A                                          | Component of the ribosome, a large ribonucleoprotein complex responsible for the synthesis of proteins in the cell                                                                                                                                                                                                                               |
|  | AT3G04400.1, emb2171 | Ribosomal protein L14p/L23e family protein, Embryo defective 2171 (emb2171); | Structural constituent of ribosome                                                                                                                                                                                                                                                                                                               |
|  | AT3G44890.1, RPL9    | 50S ribosomal protein L9, chloroplastic                                      | Plastid ribosomal protein CL9                                                                                                                                                                                                                                                                                                                    |
|  | AT3G47370            | Ribosomal protein S10p/S20e family protein                                   | Structural constituent of ribosome                                                                                                                                                                                                                                                                                                               |
|  | AT2G43030            | 50S ribosomal protein L3-1, chloroplastic                                    | One of the primary rRNA binding proteins, it binds directly near the 3'-end of the 23S rRNA, where it nucleates assembly of the 50S subunit                                                                                                                                                                                                      |
|  | AT2G04390            | Ribosomal S17 family protein                                                 | Structural constituent of ribosome                                                                                                                                                                                                                                                                                                               |
|  | AT2G05220            | Ribosomal S17 family protein                                                 | Structural constituent of ribosome                                                                                                                                                                                                                                                                                                               |
|  | AT1G80750            | Ribosomal protein L30/L7 family protein                                      | Structural constituent of ribosome                                                                                                                                                                                                                                                                                                               |

|  |                          |                                                               |                                                                                                                                   |
|--|--------------------------|---------------------------------------------------------------|-----------------------------------------------------------------------------------------------------------------------------------|
|  | EMB 1080,<br>AT3G48930.1 | Nucleic acid binding,<br>OB-fold-like protein                 | Structural constituent of<br>ribosome                                                                                             |
|  | AT1G43170.8,<br>EMB220   | Encodes a cytoplasmic<br>ribosomal protein                    | Belongs to the universal<br>ribosomal protein uL3<br>family<br>Identifier:                                                        |
|  | AT1G48350.1,<br>EMB3105  | 50S ribosomal protein<br>L18, chloroplastic                   | Binds 5S rRNA, forms<br>part of the central<br>protuberance of the 50S<br>subunit                                                 |
|  | AT3G10610.1,             | Ribosomal S17 family<br>protein                               | Structural constituent of<br>ribosome                                                                                             |
|  | AT3G10950                | Zinc-binding ribosomal<br>protein family protein              | Structural constituent of<br>ribosome                                                                                             |
|  | AT3G18740                | Ribosomal protein<br>L7Ae/L30e/S12e/Gadd<br>45 family protein | Structural constituent of<br>ribosome                                                                                             |
|  | AT3G16780                | Ribosomal protein L19e<br>family protein                      | Structural constituent of<br>ribosome                                                                                             |
|  | AT3G16080                | Zinc-binding ribosomal<br>protein family protein;             | Structural constituent of<br>ribosome. Binds to the 23S<br>rRNA                                                                   |
|  | AT1G09590.1,<br>RPL21A   | Translation protein<br>SH3-like family<br>protein, RPL21e     | Structural constituent of<br>ribosome                                                                                             |
|  | AT1G23290.1,<br>RPL27AB  | Encodes a ribosomal<br>protein L27A                           | A constituent of the large<br>subunit of the ribosomal<br>complex. Regulated by<br>TCP20                                          |
|  | AT3G25520.1,<br>RPL5A    | 60S ribosomal protein<br>L5-1                                 | Component of the<br>ribosome, a large<br>ribonucleoprotein complex<br>responsible for the<br>synthesis of proteins in the<br>cell |
|  | AT2G39460.2,<br>RPL23AA  | Encodes a 60S<br>ribosomal protein<br>L23aA (AtrpL23aA).      | Paralog of RLPL23aB                                                                                                               |
|  | AT1G69620.1, RPL34       | Putative 60S ribosomal<br>protein L34                         | Belongs to the eukaryotic<br>ribosomal protein eL34<br>family                                                                     |
|  | AT1G29970.2,<br>RPL18AA  | 60S ribosomal protein<br>L18A-1 (RPL18AA);                    | Structural constituent of<br>ribosome                                                                                             |
|  | AT2G44860                | Probable ribosome<br>biogenesis protein<br>RLP24              | Involved in the biogenesis<br>of the 60S ribosomal<br>subunit. Ensures the<br>docking of NOG1 to pre-                             |

|  |                                                  |                                                                        |                                                                                                                                                                                                                                  |
|--|--------------------------------------------------|------------------------------------------------------------------------|----------------------------------------------------------------------------------------------------------------------------------------------------------------------------------------------------------------------------------|
|  |                                                  |                                                                        | 60S particles                                                                                                                                                                                                                    |
|  | AT1G57660                                        | Translation protein SH3-like family protein                            | Structural constituent of ribosome                                                                                                                                                                                               |
|  | AT1G08360                                        | Ribosomal protein L1p/L10e family                                      | Structural constituent of ribosome, RNA binding, RNA processing                                                                                                                                                                  |
|  | AT3G48960                                        | Ribosomal protein L13e family protein                                  | Structural constituent of ribosome                                                                                                                                                                                               |
|  | AT1G36240                                        | Ribosomal protein L7Ae/L30e/S12e/Gadd 45 family protein                | Structural constituent of ribosome                                                                                                                                                                                               |
|  | AT2G41840,<br>Ribosomal protein S5 domain 2-type | Ribosomal protein S5 family protein                                    | Structural constituent of ribosome                                                                                                                                                                                               |
|  | AT1G64510                                        | Translation elongation factor EF1B/ribosomal protein S6 family protein | Binds together with S18 to 16S ribosomal RNA                                                                                                                                                                                     |
|  | AT1G02830                                        | Putative 60S ribosomal protein L22-1/L22e                              | Structural constituent of ribosome                                                                                                                                                                                               |
|  | AT2G20450                                        | Ribosomal protein L14                                                  | Structural constituent of ribosome                                                                                                                                                                                               |
|  | AT2G40590                                        | Ribosomal protein S26e family protein                                  | Structural constituent of ribosome                                                                                                                                                                                               |
|  | AT1G48630.1,<br>RACK1B_AT                        | Receptor for activated C kinase 1B, RACK1 subfamily                    | Encodes a protein with similarity to mammalian RACKs. RACKs function to shuttle activated protein kinase C to different subcellular sites and may also function as a scaffold through physical interactions with other proteins. |
|  | AT2G19730                                        | Ribosomal L28e protein family                                          | Structural constituent of ribosome                                                                                                                                                                                               |
|  | AT3G22230                                        | Ribosomal L27e protein family                                          | Structural constituent of ribosome                                                                                                                                                                                               |
|  | AT3G44590                                        | 60S acidic ribosomal protein family                                    | Plays an important role in the elongation step of protein synthesis                                                                                                                                                              |
|  | AT2G40510                                        | Ribosomal protein S26e family protein                                  | Structural constituent of ribosome                                                                                                                                                                                               |
|  | AT2G45710                                        | Zinc-binding ribosomal protein family protein                          | Structural constituent of ribosome                                                                                                                                                                                               |
|  | AT3G06680                                        | Ribosomal L29e protein family                                          | Structural constituent of ribosome                                                                                                                                                                                               |
|  | AT1G48830                                        | Ribosomal protein S7e family protein                                   | Structural constituent of ribosome                                                                                                                                                                                               |



|  |                      |                                                                         |                                                                                                                                                                                            |
|--|----------------------|-------------------------------------------------------------------------|--------------------------------------------------------------------------------------------------------------------------------------------------------------------------------------------|
|  | AT2G21580            | Ribosomal protein S25 family protein                                    | Structural constituent of ribosome                                                                                                                                                         |
|  | AT3G09500            | Ribosomal L29 family protein                                            | Structural constituent of ribosome                                                                                                                                                         |
|  | AT2G36160            | Ribosomal protein S11 family protein                                    | Structural constituent of ribosome                                                                                                                                                         |
|  | AT1G14320.1, SAC52   | Ribosomal protein L16p/L10e family protein                              | Contribute to general translation under UV-B stress. Involved in the NIK1- mediated defense response to geminivirus infection. Acts coordinately with LIMYB as a transcriptional repressor |
|  | AT2G01250            | Ribosomal protein L30/L7 family protein                                 | Structural constituent of ribosome                                                                                                                                                         |
|  | AT2G32060            | Ribosomal protein L7Ae/L30e/S12e/Gadd 45 family protein                 | Structural constituent of ribosome                                                                                                                                                         |
|  | AT3G04840            | Ribosomal protein S3Ae                                                  | Structural constituent of ribosome                                                                                                                                                         |
|  | AT2G37600            | Ribosomal protein L36e family protein                                   | Structural constituent of ribosome                                                                                                                                                         |
|  | AT1G77940            | Ribosomal protein L7Ae/L30e/S12e/Gadd 45 family protein                 | Structural constituent of ribosome                                                                                                                                                         |
|  | AT3G28900            | Ribosomal protein L34e superfamily protein                              | Structural constituent of ribosome                                                                                                                                                         |
|  | AT1G52300            | Zinc-binding ribosomal protein family protein                           | Binds to the 23S rRNA                                                                                                                                                                      |
|  | AT1G02780.1, emb2386 | Ribosomal protein L19e family protein, Embryo defective 2386 (emb2386); | Involved in translation, ribosome biogenesis, embryo development ending in seed dormancy                                                                                                   |
|  | AT1G15250            | Zinc-binding ribosomal protein family protein                           | Binds to the 23S rRNA                                                                                                                                                                      |
|  | AT1G26880            | Ribosomal protein L34e superfamily protein                              | Structural constituent of ribosome                                                                                                                                                         |
|  | AT2G09990            | Ribosomal protein S5 domain 2-like superfamily protein                  | Structural constituent of ribosome                                                                                                                                                         |
|  | AT2G47570            | Ribosomal protein L18e/L15 superfamily protein                          | Structural constituent of ribosome                                                                                                                                                         |
|  | AT3G07110            | Ribosomal protein L13 family protein                                    | Structural constituent of ribosome                                                                                                                                                         |
|  | AT3G09630            | Ribosomal protein                                                       | Structural constituent of                                                                                                                                                                  |

|  |                      |                                                               |                                                                                                                 |
|--|----------------------|---------------------------------------------------------------|-----------------------------------------------------------------------------------------------------------------|
|  |                      | L4/L1 family                                                  | ribosome                                                                                                        |
|  | AT2G37190            | Ribosomal protein L11 family protein                          | Binds directly to 26S ribosomal RNA                                                                             |
|  | AT1G15930            | Ribosomal protein L7Ae/L30e/S12e/Gadd 45 family protein       | Structural constituent of ribosome                                                                              |
|  | AT3G24830            | Ribosomal protein L13 family protein                          | Structural constituent of ribosome                                                                              |
|  | AT3G23390.1          | Zinc-binding ribosomal protein family protein                 | Structural constituent of ribosome                                                                              |
|  | AT1G12960            | Ribosomal protein L18e/L15 superfamily protein                | Structural constituent of ribosome                                                                              |
|  | AT2G47610            | Ribosomal protein L7Ae/L30e/S12e/Gadd 45 family protein       | Structural constituent of ribosome                                                                              |
|  | AT3G06700            | Ribosomal L29e protein family                                 | Structural constituent of ribosome                                                                              |
|  | AT1G57860.1          | Translation protein SH3-like family protein, RPL21e           | Structural constituent of ribosome                                                                              |
|  | AT3G05560            | Ribosomal L22e protein family                                 | Structural constituent of ribosome                                                                              |
|  | AT1G66580.1, SAG24   | Senescence associated gene 24 (SAG24)                         | Structural constituent of ribosome                                                                              |
|  | AT2G18020.1, EMB2296 | Ribosomal protein L2 family, Embryo defective 2296 (EMB2296); | Structural constituent of ribosome                                                                              |
|  | AT2G27720            | 60S acidic ribosomal protein family                           | Structural constituent of ribosome                                                                              |
|  | AT1G18540            | Ribosomal protein L6 family protein                           | Structural constituent of ribosome                                                                              |
|  | AT1G04270.1, RIG     | Encodes cytosolic ribosomal protein S15                       | Belongs to the universal ribosomal protein uS19 family                                                          |
|  | AT2G19740            | Ribosomal protein L31e family protein                         | Structural constituent of ribosome                                                                              |
|  | AT3G02190            | Ribosomal protein L39 family protein                          | Structural constituent of ribosome                                                                              |
|  | AT3G13580            | Ribosomal protein L30/L7 family protein                       | Structural constituent of ribosome                                                                              |
|  | AT3G04770.1, RPSAb   | 40S ribosomal protein Sa-2                                    | Required for the assembly and/or stability of the 40S ribosomal subunit. Required for the processing of the 20S |

|  |                   |                                           |                                                                                                                                                                                                                                   |
|--|-------------------|-------------------------------------------|-----------------------------------------------------------------------------------------------------------------------------------------------------------------------------------------------------------------------------------|
|  |                   |                                           | rRNA- precursor to mature 18S rRNA in a late step of the maturation of 40S ribosomal subunits; Belongs to the universal ribosomal protein uS2 family                                                                              |
|  | AT1G74060         | Ribosomal protein L6 family protein       | Structural constituent of ribosome                                                                                                                                                                                                |
|  | AT1G29965         | Ribosomal protein L18ae/LX family protein | Structural constituent of ribosome                                                                                                                                                                                                |
|  | AT2G25210         | Ribosomal protein L39 family protein      | Structural constituent of ribosome                                                                                                                                                                                                |
|  | AT3G11250         | Ribosomal protein L10 family protein      | Ribosomal protein P0 is the functional equivalent of E.coli protein L10                                                                                                                                                           |
|  | AT1G33140.1, PGY2 | Encodes ribosomal protein L9              | Identified in a screen for enhancers of as1. as1/pgy double mutants show defects in leaf vascular patterning and adaxial cell fate. Double mutant analysis indicates pgy genes function in the same pathway as REV, KAN1 and KAN2 |
|  | AT1G41880         | Ribosomal protein L35Ae family protein    | Structural constituent of ribosome                                                                                                                                                                                                |
|  | AT1G74270         | Ribosomal protein L35Ae family protein    | Structural constituent of ribosome                                                                                                                                                                                                |
|  | AT1G58380.1, XW6  | Ribosomal protein S5 family protein, XW6  | Structural constituent of ribosome                                                                                                                                                                                                |
|  | AT2G44120         | Ribosomal protein L30/L7 family protein   | Structural constituent of ribosome                                                                                                                                                                                                |
|  | AT3G02560         | Ribosomal protein S7e family protein      | Structural constituent of ribosome                                                                                                                                                                                                |
|  | AT3G04920         | Ribosomal protein S24e family protein     | Structural constituent of ribosome                                                                                                                                                                                                |
|  | AT2G31610         | Ribosomal protein S3 family protein       | Structural constituent of ribosome. Involved in response to salt stress, translation, response to abiotic stimulus                                                                                                                |
|  | AT3G09200         | Ribosomal protein L10 family protein      | Ribosomal protein P0 is the functional equivalent of E.coli protein L10                                                                                                                                                           |
|  | AT2G32220         | Ribosomal L27e protein                    | Structural constituent of                                                                                                                                                                                                         |

|  |                     |                                                        |                                                                                                                                                                                                                                    |
|--|---------------------|--------------------------------------------------------|------------------------------------------------------------------------------------------------------------------------------------------------------------------------------------------------------------------------------------|
|  |                     | family                                                 | ribosome                                                                                                                                                                                                                           |
|  | AT2G17360           | Ribosomal protein S4 (RPS4A) family protein            | Structural constituent of ribosome                                                                                                                                                                                                 |
|  | AT2G27530.1, PGY1   | Encodes ribosomal protein L10aP                        | Identified in a screen for enhancers of as1. as1/pgy double mutants show defects in leaf vascular patterning and adaxial cell fate. Double mutant analysis indicates pgly genes function in the same pathway as REV, KAN1 and KAN2 |
|  | AT1G01100           | 60S acidic ribosomal protein family                    | Plays an important role in the elongation step of protein synthesis                                                                                                                                                                |
|  | AT2G47110.1, UBQ6   | Ubiquitin-40S ribosomal protein S27a-2                 | Ubiquitin exists either covalently attached to another protein, or free (unanchored)                                                                                                                                               |
|  | AT2G40010           | Ribosomal protein L10 family protein                   | Belongs to the universal ribosomal protein uL10 family                                                                                                                                                                             |
|  | AT1G70600           | Ribosomal protein L18e/L15 superfamily protein         | Structural constituent of ribosome                                                                                                                                                                                                 |
|  | AT2G34480           | Ribosomal protein L18ae/LX family protein              | Structural constituent of ribosome                                                                                                                                                                                                 |
|  | AT3G09680           | Ribosomal protein S12/S23 family protein               | Structural constituent of ribosome                                                                                                                                                                                                 |
|  | AT3G11510           | Ribosomal protein S11 family protein                   | Structural constituent of ribosome                                                                                                                                                                                                 |
|  | AT3G02080           | Ribosomal protein S19e family protein                  | Structural constituent of ribosome                                                                                                                                                                                                 |
|  | AT1G26910.1, RPL10B | Ribosomal protein L16p/L10e family protein             | Structural constituent of ribosome                                                                                                                                                                                                 |
|  | AT3G04230           | Ribosomal protein S5 domain 2-like superfamily protein | Structural constituent of ribosome                                                                                                                                                                                                 |
|  | AT3G49010.3, BBC1   | Encodes 60S ribosomal protein L13                      | Homolog of human breast basic conserved 1 (BBC1)                                                                                                                                                                                   |
|  | AT1G72370.1, P40    | 40S ribosomal protein Sa-1                             | Required for the assembly and/or stability of the 40S ribosomal subunit. Required for the processing of the 20S rRNA- precursor to mature                                                                                          |

|  |           |                                                                                        |                                                                                 |
|--|-----------|----------------------------------------------------------------------------------------|---------------------------------------------------------------------------------|
|  |           |                                                                                        | 18S rRNA in a late step of the maturation of 40S ribosomal subunits             |
|  | AT3G14600 | Ribosomal protein L18ae/LX family protein                                              | Involved in N-terminal protein myristoylation, translation, ribosome biogenesis |
|  | AT2G27710 | 60S acidic ribosomal protein family. Belongs to the eukaryotic ribosomal protein P1/P2 | Plays an important role in the elongation step of protein synthesis             |
|  | AT1G07070 | Ribosomal protein L35Ae family protein                                                 | Involved in translation, ribosome biogenesis                                    |
|  | AT1G74050 | Ribosomal protein L6 family protein                                                    | Structural constituent of ribosome                                              |
|  | AT1G27400 | Ribosomal protein L22p/L17e family protein                                             | Structural constituent of ribosome                                              |
|  | AT1G67430 | Ribosomal protein L22p/L17e family protein                                             | Structural constituent of ribosome                                              |

**Table. S7. The TOR, RPS6A, RPS6B, RPL6, RPL18, RPL23.1, RPL23.2, RPL24A, RPL24B, RPS28, S6K1, and S6K2 enrichment analysis**

| Statistical background is assumed: Biological process Gene Ontology |                                                                                                     |                  |          |                      |
|---------------------------------------------------------------------|-----------------------------------------------------------------------------------------------------|------------------|----------|----------------------|
| <b>number of nodes:</b> 115                                         |                                                                                                     |                  |          |                      |
| <b>number of edges:</b> 5707                                        |                                                                                                     |                  |          |                      |
| <b>avg. local clustering coefficient:</b> 0.971                     |                                                                                                     |                  |          |                      |
| <b>PPI enrichment p-value:</b> $< 1.0 \times 10^{-16}$              |                                                                                                     |                  |          |                      |
| GO term                                                             | Description                                                                                         | Count in network | Strength | False discovery rate |
| GO:0006407                                                          | rRNA export from nucleus                                                                            | 2 of 2           | 2.32     | 0.0011               |
| GO:0002181                                                          | cytoplasmic translation                                                                             | 35 of 63         | 2.06     | 3.86E-56             |
| GO:0000463                                                          | maturation of LSU-rRNA from tricistronic rRNA transcript (SSU-rRNA, 5.8S rRNA, LSU-rRNA)            | 6 of 12          | 2.02     | 1.87E-09             |
| GO:0000461                                                          | endonucleolytic cleavage to generate mature 3'-end of SSU-rRNA from (SSU-rRNA, 5.8S rRNA, LSU-rRNA) | 2 of 4           | 2.02     | 0.0026               |
| GO:0000027                                                          | ribosomal large subunit assembly                                                                    | 16 of 33         | 2        | 1.19E-24             |
| GO:0042273                                                          | ribosomal large subunit biogenesis                                                                  | 29 of 69         | 1.94     | 1.75E-43             |
| GO:1902626                                                          | assembly of large subunit precursor of preribosome                                                  | 2 of 5           | 1.92     | 0.0036               |
| GO:0000447                                                          | endonucleolytic cleavage in ITS1 to                                                                 | 2 of 5           | 1.92     | 0.0036               |

|            |                                                                                                                 |             |      |           |
|------------|-----------------------------------------------------------------------------------------------------------------|-------------|------|-----------|
|            | separate SSU-rRNA from 5.8S rRNA and LSU-rRNA from tricistronic rRNA transcript (SSU-rRNA, 5.8S rRNA, LSU-rRNA) |             |      |           |
| GO:0000470 | maturation of LSU-rRNA                                                                                          | 9 of 23     | 1.91 | 2.80E-13  |
| GO:0042255 | ribosome assembly                                                                                               | 29 of 79    | 1.88 | 4.10E-42  |
| GO:0000028 | ribosomal small subunit assembly                                                                                | 13 of 36    | 1.88 | 1.01E-18  |
| GO:0042274 | ribosomal small subunit biogenesis                                                                              | 19 of 62    | 1.8  | 3.80E-26  |
| GO:0000462 | maturation of SSU-rRNA from tricistronic rRNA transcript (SSU-rRNA, 5.8S rRNA, LSU-rRNA)                        | 7 of 23     | 1.8  | 9.16E-10  |
| GO:0006412 | translation                                                                                                     | 120 of 433  | 1.76 | 3.47E-191 |
| GO:0030490 | maturation of SSU-rRNA                                                                                          | 8 of 30     | 1.74 | 1.01E-10  |
| GO:0022618 | ribonucleoprotein complex assembly                                                                              | 29 of 122   | 1.69 | 2.00E-37  |
| GO:0042254 | ribosome biogenesis                                                                                             | 56 of 250   | 1.67 | 2.01E-73  |
| GO:0006414 | translational elongation                                                                                        | 5 of 33     | 1.5  | 9.76E-06  |
| GO:0016072 | rRNA metabolic process                                                                                          | 21 of 142   | 1.49 | 3.93E-23  |
| GO:0006364 | rRNA processing                                                                                                 | 20 of 136   | 1.48 | 5.41E-22  |
| GO:0010506 | regulation of autophagy                                                                                         | 2 of 14     | 1.47 | 0.0171    |
| GO:0030307 | positive regulation of cell growth                                                                              | 2 of 16     | 1.41 | 0.0211    |
| GO:0009955 | adaxial/abaxial pattern specification                                                                           | 4 of 34     | 1.39 | 0.0003    |
| GO:0045727 | positive regulation of translation                                                                              | 2 of 17     | 1.39 | 0.0229    |
| GO:0043410 | positive regulation of MAPK cascade                                                                             | 2 of 23     | 1.26 | 0.0364    |
| GO:0001934 | positive regulation of protein phosphorylation                                                                  | 4 of 48     | 1.24 | 0.00098   |
| GO:0032270 | positive regulation of cellular protein metabolic process                                                       | 6 of 123    | 1.01 | 0.00034   |
| GO:0010224 | response to UV-B                                                                                                | 3 of 63     | 1    | 0.0239    |
| GO:0044267 | cellular protein metabolic process                                                                              | 123 of 2826 | 0.96 | 3.07E-106 |
| GO:0034645 | cellular macromolecule biosynthetic process                                                                     | 121 of 2793 | 0.95 | 6.45E-103 |
| GO:0044271 | cellular nitrogen compound biosynthetic process                                                                 | 121 of 2881 | 0.94 | 1.78E-101 |
| GO:0010467 | gene expression                                                                                                 | 121 of 2929 | 0.93 | 1.13E-100 |
| GO:0009735 | response to cytokinin                                                                                           | 8 of 212    | 0.89 | 0.00011   |
| GO:0006417 | regulation of translation                                                                                       | 4 of 130    | 0.81 | 0.024     |
| GO:0071840 | cellular component organization or biogenesis                                                                   | 59 of 2471  | 0.7  | 1.03E-25  |
| GO:0006996 | organelle organization                                                                                          | 30 of 1283  | 0.69 | 6.80E-12  |
| GO:0009409 | response to cold                                                                                                | 7 of 347    | 0.62 | 0.0112    |
| GO:0016043 | cellular component organization                                                                                 | 32 of 2271  | 0.47 | 2.85E-07  |
| GO:0009987 | cellular process                                                                                                | 126 of 5356 | 0.39 | 7.66E-43  |

|                           |                                                                                                     |                         |                 |                             |
|---------------------------|-----------------------------------------------------------------------------------------------------|-------------------------|-----------------|-----------------------------|
|                           |                                                                                                     |                         |                 |                             |
| <b>Molecular function</b> | <b>Gene Ontology</b>                                                                                |                         |                 |                             |
| <b>GO term</b>            | <b>Description</b>                                                                                  | <b>Count in network</b> | <b>Strength</b> | <b>False discovery rate</b> |
| GO:0006407                | rRNA export from nucleus                                                                            | 2 of 2                  | 2.32            | 0.0011                      |
| GO:0002181                | cytoplasmic translation                                                                             | 35 of 63                | 2.06            | 3.86E-56                    |
| GO:0000463                | maturation of LSU-rRNA from tricistronic rRNA transcript (SSU-rRNA, 5.8S rRNA, LSU-rRNA)            | 6 of 12                 | 2.02            | 1.87E-09                    |
| GO:0000461                | endonucleolytic cleavage to generate mature 3'-end of SSU-rRNA from (SSU-rRNA, 5.8S rRNA, LSU-rRNA) | 2 of 4                  | 2.02            | 0.0026                      |
| GO:0000027                | ribosomal large subunit assembly                                                                    | 16 of 33                | 2               | 1.19E-24                    |
| GO:0042273                | ribosomal large subunit biogenesis                                                                  | 29 of 69                | 1.94            | 1.75E-43                    |
| GO:1902626                | assembly of large subunit precursor of preribosome                                                  | 2 of 5                  | 1.92            | 0.0036                      |
| GO:0000447                | maturation of LSU-rRNA                                                                              | 7 of 23                 | 1.76            | 3.47E-191                   |
| GO:0000470                | ribosome assembly                                                                                   | 120 of 433              | 1.74            | 1.01E-10                    |
| GO:0042255                | ribosomal small subunit assembly                                                                    | 8 of 30                 | 1.69            | 2.00E-37                    |
| GO:0000028                | ribosomal small subunit biogenesis                                                                  | 29 of 122               | 1.67            | 2.01E-73                    |
| GO:0042274                | maturation of SSU-rRNA from tricistronic rRNA transcript (SSU-rRNA, 5.8S rRNA, LSU-rRNA)            | 56 of 250               | 1.5             | 9.76E-06                    |
| GO:0000462                | translation                                                                                         | 5 of 33                 | 1.49            | 3.93E-23                    |
| GO:0006412                | maturation of SSU-rRNA                                                                              | 21 of 142               | 1.48            | 5.41E-22                    |
| GO:0030490                | ribonucleoprotein complex assembly                                                                  | 20 of 136               | 1.47            | 0.0171                      |
| GO:0022618                | ribosome biogenesis                                                                                 | 2 of 14                 | 1.41            | 0.0211                      |
| GO:0042254                | translational elongation                                                                            | 2 of 16                 | 1.39            | 0.0003                      |
| GO:0006414                | rRNA metabolic process                                                                              | 4 of 34                 | 1.39            | 0.0229                      |
| GO:0016072                | rRNA processing                                                                                     | 2 of 17                 | 1.26            | 0.0364                      |
| GO:0006364                | regulation of autophagy                                                                             | 2 of 23                 | 1.24            | 0.00098                     |
| GO:0010506                | positive regulation of cell growth                                                                  | 4 of 48                 | 1.01            | 0.00034                     |
| GO:0030307                | adaxial/abaxial pattern specification                                                               | 6 of 123                | 1               | 0.0239                      |
| GO:0009955                | positive regulation of translation                                                                  | 3 of 63                 | 0.96            | 3.07E-106                   |
| GO:0045727                | positive regulation of MAPK cascade                                                                 | 123 of 2826             | 0.95            | 6.45E-103                   |
| GO:0043410                | positive regulation of protein phosphorylation                                                      | 121 of 2793             | 0.94            | 1.78E-101                   |
| GO:0001934                | positive regulation of cellular protein metabolic process                                           | 121 of 2881             | 0.93            | 1.13E-100                   |
| GO:0032270                | response to UV-B                                                                                    | 121 of 2929             | 0.89            | 0.00011                     |
| GO:0010224                | cellular protein metabolic process                                                                  | 8 of 212                | 0.81            | 0.024                       |
| GO:0044267                | cellular macromolecule biosynthetic process                                                         | 4 of 130                | 0.7             | 1.03E-25                    |
| GO:0034645                | cellular nitrogen compound biosynthetic                                                             | 59 of                   | 0.69            | 6.80E-12                    |



|            |                           |               |      |          |
|------------|---------------------------|---------------|------|----------|
|            | process                   | 2471          |      |          |
| GO:0044271 | gene expression           | 30 of<br>1283 | 0.62 | 0.0112   |
| GO:0010467 | response to cytokinin     | 7 of 347      | 0.47 | 2.85E-07 |
| GO:0009735 | regulation of translation | 32 of<br>2271 | 0.39 | 7.66E-43 |
